# Supplementary material for: T&C-CROP: Representing mechanistic crop growth with a terrestrial biosphere model (T&C, v1.5): Model formulation and validation
Source: Copernicus journal article supplement (doi:10.5194/egusphere-2024-2072), 2024-09-03
Supplement: Supplementary file [file egusphere-2024-2072-AC2-supplement.zip]

# **T&C-CROP: Representing mechanistic crop growth with a terrestrial biosphere model (T&C, v1.5): Model formulation and validation.**

Jordi Buckley Paules<sup>1</sup>, Simone Fatichi<sup>2</sup>, Bonnie Warring<sup>3</sup>, Athanasios Paschalis<sup>1</sup>

<sup>1</sup>Department of Civil and Environmental Engineering, Imperial College London.

5 <sup>2</sup> Department of Civil and Environmental Engineering, National University of Singapore.

<sup>3</sup> Grantham Institute on Climate Change and the Environment, Imperial College London.

*Correspondence to:* Jordi Buckley Paules ([j.buckley21@ic.ac.uk](mailto:j.buckley21@ic.ac.uk))

10

15

20

## Abstract:

25 Cropland cultivation is fundamental to food security and plays a crucial role in the global water, energy, and carbon cycles. However, our understanding of how climate change will impact cropland functions is still limited. This knowledge gap is partly due to the simplifications made in Terrestrial Biosphere Models (TBMs), which often overlook essential agricultural management practices such as irrigation and fertilizer application, and simplify critical  
30 physiological crop processes.

Here we demonstrate how with minor, parsimonious enhancements to the TBM T&C it is possible to accurately represent a complex cropland system. Our modified model, T&C-CROP, incorporates realistic agricultural management practices, including complex crop rotations, irrigation and fertilization regimes, along with their effects on soil biogeochemical cycling. We  
35 successfully validate T&C-CROP across four distinct agricultural sites, encompassing diverse cropping systems such as multi-crop rotations, monoculture, and managed grassland.

A comprehensive validation of T&C-CROP was conducted, encompassing water, energy, and carbon fluxes, Leaf Area Index (LAI), and organ-specific yields. Our model effectively captured the heterogeneity in daily land surface energy balances across crop sites, achieving coefficients  
40 of determination of 0.77, 0.48, and 0.87 for observed versus simulated net radiation ( $R_n$ ), sensible heat flux ( $H$ ), and latent heat flux ( $LE$ ), respectively. Seasonal, crop-specific gross primary production (GPP) was simulated with an average absolute bias of less than 10%. Peak season LAI was accurately represented, with an  $r^2$  of 0.67. Harvested yields (above-ground biomass, grain, and straw) were generally simulated within 10-20% accuracy of observed  
45 values, although inter-annual variations in crop-specific growth were difficult to capture.

# 1.Introduction

## 1.1 Climate Change, food security and the need for process-based crop models.

Understanding the impact of weather and field management on cropland productivity is critical, not least in the face of mounting challenges such as anthropogenic climate change and shifting socio-demographics (Godfray et al. 2010; Foley et al. 2011; FAO, 2022; Cammarano et al. 2022; Wang et al. 2022). The effects of climate change on both local and global agri-food systems are expected to increase, with shifts in the frequency, intensity, and timing of droughts and heatwaves, all posing real threats to crop growth (Ortiz-Bobea et al. 2021;Dury et al. 2022; FAO, 2022; Kim and Mendelshorn, 2023). The effects of climate change on agriculture are set to vary spatially, with a large degree of heterogeneity between regions (Semenov, 2009; Waha et al. 2013; Ukkola et al. 2020;Moustakis et al. 2021; Slater et al. 2022). Therefore mitigation efforts will demand a nuanced understanding of processes, causes and ultimately, effects. For example, as a function of anthropogenic emissions, global CO<sub>2</sub> is rising roughly uniformly, however its effect on crop growth dynamics, termed the CO<sub>2</sub> fertilization effect, is likely to vary regionally (McGrath and Lobell, 2013); likely due to complex non-linear interactions between CO<sub>2</sub>, temperature, water and nutrient availability. Processes such as the above make the study of climate-crop interactions particularly interesting, and complex (Lawlor and Mitchel, 1991; Polley, 2002; Fatichi et al. 2016; Cernusak, 2020; Hussain et al. 2021).

One way to address the challenges climate change poses to crops is to deepen our understanding of climate-crop interactions and their interface with field management practices through the development of process-based models. A particular strength of this approach is its potential to enhance our understanding and forecasting capabilities beyond current or past observations (Boote et al., 2013; Muller and Martre, 2019). Such research is vital to align agronomic strategies with societal food demands, all whilst promoting environmental sustainability, as emphasized by Cassman and Grassini (2020).

## 1.2 Diversity in crop models, strengths and limitations

A vast array of models have been developed to capture the interactions between soil, crop, climate and field management practices. It is possible to lump these models into one of three categories; statistical, conceptual or physics based. **Statistical** models are entirely data driven and contain little to no pre-conceived representation of physical processes, they rely on historical data to establish statistical relationships between crop yield and climate variables (e.g. Lobell and Burke, 2010; Gaupp et al. 2019; Van Klompenburg et al. 2020; Ansarifar et al. 2021; Slater et al. 2022). **Conceptual** models represent key physical processes in a simplified fashion which can then be parameterised or calibrated to best fit observational data, an example is Aquacrop (Steduto et al. 2009) but many other crop models have been developed with this approach (Di Paola et al. 2016). **Physics based** models codify state of the art understanding of physical laws, such as conservation of energy, water, carbon and momentum, into a crop modelling framework. Examples here include CLM-CROP (Drewniak et al. 2013; Bilonis et al. 2014; Sheng et al. 2018; Boas et al. 2021), JULES-CROP (Osborne et al. 2014; Williams et al. 2017), Gecros (Ingwersen et al. 2018) or ORCHIDEE-CROP (Wu et al. 2016). These physics-based models are built on the latest scientific understanding of soil-plant-atmosphere interactions. They start by resolving photosynthesis and plant energy budgets and incorporate key processes such as water and nutrient uptake, crop phenology, and carbon allocation schemes (Fatichi et al. 2019; He et al. 2021; Wiltshire et al. 2021). A comprehensive review on the respective limitations of different modelling frameworks is provided by Roberts et al. (2019). Comparative studies have shown that, in terms of yield prediction, process-based models are currently less effective than their statistical counterparts (Leng and Hall, 2020). This may be attributed to the higher complexity of physics-based models, where yield is the by-product of multiple processes, and to current data limitations that hinder the proper parameterization and calibration of these models (He et al., 2017).

100 The question thus arises as to why prioritise further development of physics-based models in  
agricultural research? Firstly, physics-based models address several limitations inherent to  
statistical crop models. These limitations include issues such as multicollinearity between  
climate variables and yield, as well as lack of potential generalizability beyond their calibration  
envelope. This latter point is crucial, as statistical models rely on historical climate-yield  
105 relationships which may not hold true under future climates (Sheehy et al. 2006; Boote et al  
2013; Lobell and Asseng, 2017). Secondly, physics based models offer explicit representation  
of coupled dynamics, including water, carbon and nutrient cycles. These dynamics are expected  
to be significantly impacted by climate change, making their understanding crucial for accurate  
crop yield projections and sustainable agricultural management. Lastly, whilst physics-based  
110 models do currently face challenges due to data requirements, such as climate forcing and crop-  
specific traits, this obstacle is expected to diminish over time. The integration of evolving plant  
databases, such as the TRY database (Kattge et al. 2020), and advancements in remote  
sensing technologies (Khanal et al, 2020; Wu et al. 2023) are anticipated to yield more  
comprehensive datasets. This increasing availability of data is likely to enhance the  
115 effectiveness and reliability of future physics-based crop models.

### **1.3 Space for a new TBM Crop model, needed developments.**

In a bid to better capture the intricacies of cropland dynamics, various previous studies have  
further developed existing TBMs akin to T&C (Fatichi et al. 2012;2019). Examples include,  
JULES-CROP (Osborne et al. 2014), CLM-Crop (Drewniak et al. 2013; Bilonis et al. 2014;  
120 Sheng et al. 2018; Boas et al. 2021), ORCHIDEE-Crop (Wu et al., 2016) and CARAIB DGVM  
(Jacquemin et al. 2021). Commonly, model developments in the context of TBMs centre on the  
introduction of new crop-specific modules, which incorporate crop-specific carbon pools and  
dynamics alongside harvest indexes and management options. While these past endeavours  
represent a significant step forward, they often introduce multiple modifications that may not  
125 generalize well.

Despite these advancements, there remains a need to improve the integration of crop management practices such as sowing, harvesting, irrigation, and fertilizer application within TBMs. This would more comprehensively capture the coupled dynamics of plant growth and soil biogeochemical cycles, as influenced by crop nutrient uptake and the timing and quantity of NPK fertilizer application. For example, previous work with JULES-CROP (2014) omitted nutrient limitations, while ORCHIDEE-Crop (Wu et al. 2016) addressed nutrient limitation via a simple empirical 0-1 index limiting crop growth. Furthermore, irrigation practices need better incorporation; ORCHIDEE-Crop (Wu et al. 2016) omitted irrigation, while JULES-CROP (Williams et al. 2017) assumed perfect irrigation, neglecting soil moisture as a crop growth stress factor. Additionally, there is a need to transition from empirical harvest indices or harvest-specific carbon pools to a fully integrated mechanistic approach, whereby crop yield is derived from generalizable carbon organ-specific pools being harvested.

Most importantly, the goal of introducing crops into Terrestrial Biosphere Models (TBMs) should be to do so with minimal changes to the existing model structure for natural vegetation, as most physical and biophysical processes are similar. We argue that this can be accomplished without adding additional carbon pools or extensive model modifications and parameter additions. The aim is to demonstrate that accurate crop representation within a TBM can be achieved in a parsimonious manner, avoiding the need for crop-specific parameterizations that are difficult to generalize. This approach differentiates our model from previous formulations.

Our study introduces T&C-CROP to address the aforementioned challenges, building on the success of previous Terrestrial Biosphere Models (TBMs). Previous developments to T&C (Fatichi et al. 2012; 2019) have ensured that an effective representation of crops, irrigation, and fertilizer application can now be seamlessly integrated into the established vegetation carbon pool dynamics. This integration links agricultural practices with water and energy budgets, plant growth development, and soil biogeochemical cycling. All enhancements to the original T&C model to better represent crop processes revolve around minimal structural changes.

155 Specifically, only three new parameters are added to the original model, along with prescribed irrigation, fertilizer, and sowing/harvesting dates.

To assess the effectiveness of T&C-CROP, we evaluated model performance in terms of energy, water and carbon fluxes with on-site eddy covariance data and benchmarked it against  
160 other TBMs with dedicated crop-specific modules at the same sites. We also assessed T&C-CROP's skill in predicting crop yields, specifically examining carbon allocation to various pools, making good use of detailed harvest data available across the selected sites. The evaluation covers four fields which employ varied management strategies and operate in diverse climates.

## 2. Materials and Methods

### 165 2.1 Overview of T&C

T&C is a state-of-the-art terrestrial biosphere model (Fatichi et al. 2012;2019) which resolves the land surface energy balance, water balance and soil C/N/P/K dynamics. T&C has been successfully used in several ecosystems globally covering a wide range of scenarios, for example assessing the impacts of fertilization on grassland productivity in the European Alps  
170 (Botter et al. 2021) or assessing ecohydrological changes after tropical conversion to oil palm (Manoli et al. 2018). T&C operates across various time scales, tailoring its resolution to the specific process being resolved. Specifically, the energy budget is resolved at hourly scales, water and photosynthesis are computed at the hourly scale, with the exception of soil water flow that uses an adaptive sub-hourly step, vegetation carbon pools and soil C/N/P/K dynamics are  
175 resolved at the daily scale. Inputs consist of hourly meteorological data (precipitation, temperature, wind speed, atmospheric pressure, relative humidity, shortwave and longwave radiation, atmospheric CO<sub>2</sub> concentration). Site parameterization requires site-specific information including soil texture, and plant specific traits for tailoring the dynamic vegetation component. T&C does not use predefined plant functional types, but rather focuses on specific  
180 vegetation types (e.g. conifer, oak, grassland, palm) and thus requires the model user to input

parameter values based on the particular vegetation type being simulated. T&C can be run as a plot-scale version, i.e., without an explicit treatment of the topography and lateral fluxes (e.g., Paschalis et al. 2017; Manoli et al. 2018 and this study) or alternatively in a spatially explicit manner (i.e., as a fully distributed model defined on a regular 2D mesh ~~as a fully distributed model defined on a regular 2D mesh~~), which accounts for complex topography by considering local and remote solar radiation shading effects and lateral transfer of water in the surface and subsurface (e.g., Paschalis et al. 2017; Mastrotheodoros et al. 2020; Paschalis et al. 2022).

The hydrological module of T&C is physics-based and models interception, throughfall, canopy water storage, runoff and soil water dynamics, as well as snow and ice hydrology. Soil water dynamics are represented in the point scale simulations via the 1-D Richards equation. In this study soil hydraulic conductivity alongside the shape of the water retention curve are estimated based on user-defined soil texture; following the Saxton and Rawls pedotransfer function (Saxton and Rawls, 2006; Paschalis et al. 2022). However, T&C can also use custom water retention curves including the van Genuchten model and more complex soil hydraulic function accounting for soil structural effects (Fatichi et al. 2020). Plant-water uptake is simulated using a sink term, with plant transpiration uptake being thus proportional to root biomass which decays exponentially with soil depth. Both saturation and infiltration excess mechanisms are used for runoff generation (Fatichi et al. 2012).

The surface energy balance is resolved by balancing net radiation with latent, sensible and ground heat fluxes. In T&C, we use the two-stream approximation for estimating net shortwave radiation with a canopy being split into a sun and shaded fraction (de Pury and Farquhar, 1997; Wang and Leuning, 1998; Dai et al. 2004). Latent and sensible heat fluxes are parameterized using the resistance analogue, with aerodynamic, leaf-boundary layer, stomatal, and under canopy air resistances as well as soil resistance all included (e.g. Leuning, 1995; Niyogi and Raman, 1997; Haghigi et al. 2013; Paschalis et al. 2017).



Plant carbon dynamics in T&C are inspired by Friedlingstein et al. (1998) and Krinner et al. (2005). Vegetation is conceptualized using 7 carbon pools for woody vegetation (leaves, living sapwood, heartwood, dead leaves, roots, carbohydrate reserves and fruits and flowers) and 5 pools for herbaceous species with the sapwood and hardwood carbon pools suppressed. Carbon allocation is governed by phenology, environmental stresses, and stoichiometric constraints for C:N, C:P, C:K ratios across all tissues which in turn depend on the potential of plants to acquire necessary macronutrients (NPK) from the ground via root uptake and mycorrhiza symbiosis. In T&C, for extratropical climates we have four phenological stages (dormant, maximum and normal growth, and senescence) defined by temperature, day length, water stress and leaf age. Initially, carbon is assimilated via photosynthesis which is based on Farquhar et al. (1980) for C3, and Collatz et al. (1991, 1992) for C4 plants with subsequent adjustments (Bonan et al. 2011) and then scales from leaf to canopy scale according to a two big leaves approach (Wang and Leuning, 1998; Dai et al., 2004). This approach has the benefit of taking into account the vertical distribution of nitrogen and therefore also of photosynthetic capacity. The CAM photosynthetic pathway is currently not considered. Stomatal conductance follows Leuning (1990; 1995) and has been recently adapted to consider plant hydraulics (Paschalis et al. 2024) although this scheme is not considered here. Any assimilated carbon which is not respired via maintenance and growth respiration, is subsequently partitioned into one of five carbon pools (foliage, living sapwood, roots, carbohydrate reserves or fruits and flowers) via an empirical allocation scheme; largely based on phenological stages and light and water availability. The translocation of carbon between pools is also considered, enabling the depletion of carbon stored as reserves. This better represents the responses of vegetation to stress and changes in phenological stages. Details of plant phenology dynamics are outlined in the supplementary of Fatichi et al. 2012.

The latest version of T&C includes soil carbon and nutrient (nitrogen, phosphorus, and potassium) dynamics (Fatichi et al. 2019). Options for anthropogenic nutrient application (fertilizer), in both mineral and organic forms have been added (Botter et al. 2021). Leaching of dissolved nutrients is also computed by coupling soil biogeochemistry with T&C's soil hydrology

235 module. Specifically, the biogeochemistry module separates plant litter into different pools  
based on decomposability recalcitrance and account for different soil organic carbon functional  
pools, as mineral associated, particulate and dissolved organic carbon. Its  
decomposition/mineralization depends on the activities of microbial biomass separated between  
bacteria and fungi and macrofauna in the soil. NPK cycles (including fertilizer application) are  
linked to microbial dynamics and naturally, plant growth. A comprehensive outline of T&C soil  
240 biogeochemistry is provided by Fatichi et al. (2019) and Botter et al. (2021).

## 2.2 From T&C to T&C-CROP

T&C-CROP adds parameterizations designed to enhance the representation of crops within the  
T&C model, improving its ability to simulate crop vegetation dynamics. Our approach aimed at  
being as parsimonious as possible, limiting complexities which are often part of crop  
245 implementations in process-based models (e.g., Ingwersen et al. 2018). The T&C model  
structure was modified to better tailor specific leaf area, carbon allocation, leaf turnover, and  
photosynthetic efficiency of senesced leaves to crop conditions. It was possible to achieve this  
by only adding three new crop-specific parameters (outlined below). Model developments are  
visually outlined in Figure 1 and further discussed in this section.

250

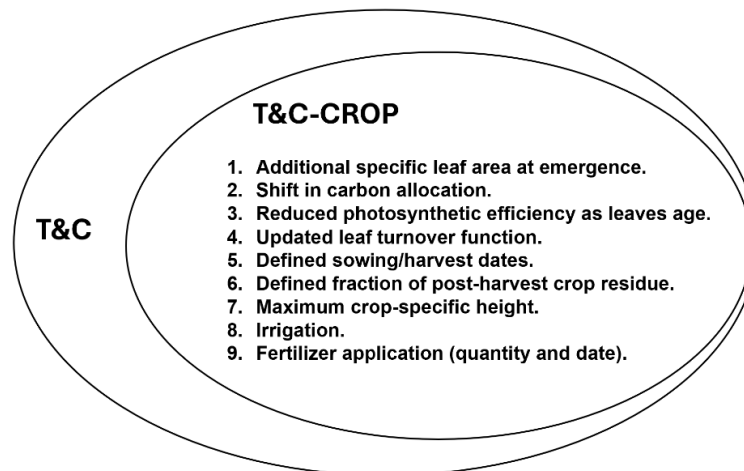

255 **Figure 1** Illustrating model developments implemented into the pre-existing T&C model structure in order to develop T&C-CROP.

Crops, like many plants, exhibit changes in their Specific Leaf Area (SLA) over time (Amanullah, 2015; Li et al. 2023), defined as the leaf area divided by its dry weight ( $\text{m}^2 \text{kg}^{-1}$ ). Early in their growth stages, leaves tend to have a higher SLA, indicating thinner and cheaper leaves that facilitate rapid expansion of the leaf canopy and higher photosynthetic rates for invested carbon, essential for early plant growth post-germination. However, as leaves age, they typically become thicker, resulting in a lower SLA. To better capture this phenomenon and align with observed trends, we've implemented a dynamic SLA in T&C-CROP. This dynamic SLA is modelled with a linearly decaying rate from an initial maximum SLA until the leaf age reaches the value of the phenological stage of maximum growth, beyond which SLA retains a constant value.

$$SLA_{new} = \begin{cases} SLA + \left(1 - \frac{Age_L}{dmg}\right) * SL_{emercrop}, & \text{if } Age_L < dmg \\ SLA, & \text{if } Age_L \geq dmg \end{cases} \quad [1]$$

Where,  $SLA$  represents the full grown crop static specific leaf area ( $\text{m}^2 \text{gC}^{-1}$ ),  $Age_L$  [days] denotes the age of the leaf in days,  $SL_{emercrop}$  is a [new parameter](#) representing the additional  $SLA$  at emergence which can be crop-dependent, and  $dmg$  signifies the days of maximum leaf growth phenology stage, which is a model parameter. Variable names are intentionally kept identical to model parameters in T&C which can be accessed from our repository (see data availability).

We also aimed to enhance the portrayal of the initial leaf flushing period. At the onset of crop growth, carbon allocation to fruits and flowers is impeded, with newly assimilated carbon instead directed towards leaf development. As the initial leaf flush concludes, carbon allocation shifts predominantly towards the fruits and flower pool with a reference value allocation fraction  $f_{fr}$  [-] to this pool, which is significantly higher than for natural vegetation, while allocation to living sapwood is reduced or nullified if the crop does not have a stem component by using a [new](#)

285 crop specific parameter  $so_{crop}$  [-] which is the carbon allocation fraction to stem. These values can be user-defined and crop-specific, but generally for crops  $f_{fr}$  is in the order of 0.2-0.5 and  $so_{crop}$  in the order of 0.0-0.1.

Typically, photosynthetic efficiency decreases as leaves age. For example, this is the case with wheat (Suzuki et al. 1987). To replicate the rapid drop in late season photosynthesis of  
290 senesced leaves, once a leaf's age exceeds a critical threshold ( $age_{cr}$ ), the photosynthetic efficiency is reduced as a power law (power of minus eight) of the relative age ( $r_{age}$ ). Where  $r_{age}$  is the relative time from leaf onset exceeding  $age_{cr}$ .

Additionally, we updated the leaf turnover function, which represents the rate of leaf mortality  
295 due to aging. Our update is illustrated below in Eq. 2, where  $dla$  is the leaf death rate [ $days^{-1}$ ] due to age,  $age_{cr}$  is the critical leaf age (a crop-specific parameter), and  $AgeL$  [day] is the current average age of the leaf (a prognostic variable). Previously, T&C applied a linear relation for grass and extratropical evergreen trees and a power law for deciduous tree leaves (Fatichi et al., 2012; 2019). Our modification, in the form of a sigmoidal function (Supplementary 1),  
300 ensures that the majority of leaf turnover occurs as leaf age approaches the critical age, and suppresses completely leaf mortality in the early phases, which is more realistic for crops.

$$dla = \left(\frac{1}{age_{cr}}\right) \times \left(\frac{1}{2} \tanh\left(10 \times \left(\frac{AgeL}{age_{cr}}\right) - 7\right) + 0.5\right) \quad [2]$$

305 To enable crop representation in T&C-CROP, we have introduced the option of user defined sowing and harvesting dates. In the model, sowing is conceptualized by introducing an initial carbon stock for fine root biomass and non-structural carbohydrates, comparable to typical seed applications, from which the crops evolve post-germination. Root depth can be parameterized as a function of fine root biomass and fine root growth, if allometric relationships are available,  
310 or kept constant if such knowledge is unavailable. After crop establishment, leaf age or

environmental stress can trigger crop senescence before harvesting. Additionally, to accommodate multiple crop management practices, users can define the fraction of the crop left in the field post-harvest. This feature can be tailored to specific crops or management practices, such as leaving stems behind while harvesting only grains. This flexibility allows for a more  
315 nuanced representation of different cropping systems and practices within the model.

## 2.3 Simulation Setup

T&C-CROP was run at a plot scale (i.e., neglecting topographic features) and used site-specific hourly meteorological data, retimed from the half-hourly data available from local weather observations (Table 2). In T&C-CROP the partitioning of shortwave radiation to direct/diffuse  
320 and different wavelengths such as Photosynthetic Active Radiation (PAR) was done using REST2, as implemented in AWEGEN (Fatichi et al. 2011; Peleg et al. 2017). Site-specific data such as dates of planting/sowing/irrigation/fertilizer application and soil type were obtained either from available literature (references in Table 2) or directly from the site's PI. To balance the soil carbon and nitrogen pools an appropriate spin-up was run, the length required to reach  
325 a dynamic steady state was site dependent but normally in the order of 200 years.

T&C-CROP, like T&C does not use generic plant functional types, meaning the user must input plant or crop-specific parameters, the most important of which are illustrated in Table 1. These were obtained from literature and the TRY database (Kattge et al. 2020; Fraser, 2020).  
330 However, the final values used in the model runs were adjusted within a  $\pm 30\%$  range from the reported values as part of a manual trial and error calibration, necessary to best fit the cultivar type being sown on each site ([Supplementary S24.5](#)). Therefore, [the model needs to be re-parameterized](#) for certain parameters [for each site](#). Temperature and daylength thresholds for phenological changes were retrieved with expert knowledge and [manual calibration](#) at each site  
335 matching leaf area observations. Furthermore, in T&C-CROP the user inputs the date of sowing, therefore the start date for crop growth is largely prescribed through crop management. Other models such as AquaCrop (Steduto et al. 2009) calculate the sowing date dynamically based

on local environmental conditions. This is also possible in T&C-CROP, but for this study, as sowing dates were available at all sites (Supplementary 32), for best realism they were prescribed. Following emergence, plant growth is purely dependent on local climate and environmental conditions. Inputs regarding fertilizer/irrigation application are inputted based on the management log shared by the PI (e.g. Supplementary 43) or where not available we used typical values for the region and crop type.

**Table 1** Illustrating some of the most important crop-specific parameters necessary to run T&C-CROP. The last three parameters in bold are the new parameters introduced with this study.

| CROP MODEL VARIABLES |                                          |                                              |
|----------------------|------------------------------------------|----------------------------------------------|
| PARAMETER            | UNIT                                     | DESCRIPTION                                  |
| SL                   | m <sup>2</sup> / gC                      | Specific leaf area                           |
| AGE_CR               | day                                      | Critical Leaf Age                            |
| TLO                  | Celsius                                  | Temperature for leaf onset                   |
| DMG                  | day                                      | Days of Max Growth                           |
| TRR                  | gC / m <sup>2</sup> d                    | Translocation rate                           |
| LDAY_MIN             | -                                        | Minimum Day duration for leaf onset          |
| LTR                  | -                                        | Leaf to Root ratio maximum                   |
| VCMAX                | μmol CO <sub>2</sub> / m <sup>2</sup> s] | Maximum Rubisco capacity at 25°C leaf level  |
| BFAC                 | -                                        | Leaf onset water stress threshold            |
| ASE                  | C3/C4                                    | Photosynthesis type                          |
| LDAYCRIT             | hours                                    | Threshold for senescence (hours of daylight) |
| FF_R                 | -                                        | Fraction of biomass allocated to fruit       |
| <b>SL_EMECROP</b>    | m <sup>2</sup> /gC                       | Additional SLA at emergence.                 |
| <b>SO_CROP</b>       | -                                        | Fraction of biomass allocated to stem        |
| <b>MAX_HEIGHT</b>    | m                                        | Maximum crop height                          |

## 2.4 Description of selected sites and validation data

It is crucial to model agricultural fields which experience both monocropping and crop rotations, as these practices are significant and widespread (Eurostat, 2020). This modelling approach also serves as an excellent benchmark for complex mechanistic crop models such as T&C-CROP. An important objective was to select sites with on-site observational records that could demonstrate T&C-CROP's capability to continuously simulate field growth across various rotation and management practices within a single simulation. This contrasts with the common practice of starting a new simulation for each crop individually. The benefit of a continuous model simulation is that this allows T&C-CROP to account for legacy soil conditions, including soil moisture, soil carbon, based on historical management practices—such as crop residue management, fertilizer application, and irrigation. This approach ensures our model accurately

reflects the cumulative impact of past agricultural practices on current and future crop performance.

360 To showcase T&C-CROP’s capabilities, we selected four well-monitored agricultural sites, all characterized by a temperate climate but featuring diverse cropping systems and management practices. These sites are affiliated with FLUXNET (Heinesch et al. 2021) and have been previously utilized for model evaluations (e.g., Boas et al. 2021), making them ideal for model intercomparison and benchmarking. Further details about the selected sites are provided in

365 Table 2.

**Table 2** Information regarding the agricultural sites used in this study.

| Site                                  | Crops                                                                                   | Years Simulated | Further site specific info                                                                        | FLUXNET Link                                                                                        |
|---------------------------------------|-----------------------------------------------------------------------------------------|-----------------|---------------------------------------------------------------------------------------------------|-----------------------------------------------------------------------------------------------------|
| CH-OE2<br>(Solothurn,<br>Switzerland) | Wheat, Barley,<br>Grass, Potato,<br>Rapeseed,<br>Peas. (Rainfed)                        | 2004-2020       | Dietiker et al.<br>(2010);<br>Ecosystem<br>Thematic Center<br>(2021).                             | <a href="https://fluxnet.org/sites/siteinfo/CH-Oe2">https://fluxnet.org/sites/siteinfo/CH-Oe2</a>   |
| CH-CHA<br>(Zug,<br>Switzerland)       | Grass (Rainfed)                                                                         | 2006-2015       | Hörtnagl et al.<br>(2018)                                                                         | <a href="https://fluxnet.org/sites/siteinfo/CH-Cha">https://fluxnet.org/sites/siteinfo/CH-Cha</a>   |
| US-NE1<br>(Nebraska,<br>USA)          | Maize<br>(Irrigated)                                                                    | 2002-2013       | Suykeret al.<br>(2004)                                                                            | <a href="https://fluxnet.org/sites/siteinfo/US-Ne1">https://fluxnet.org/sites/siteinfo/US-Ne1</a>   |
| BE-LON<br>(Valonia,<br>Belgium)       | Sugar Beet,<br>Wheat,<br>Potatoes,<br>Mustard (cover<br>crop), Maize,<br>Oat. (Rainfed) | 2004-2020       | Dufranne et al.<br>(2011), Buysse et<br>al 2017, Moureux<br>et al. 2006;<br>Dumont et al.<br>2023 | <a href="https://fluxnet.org/doi/FLUXNET2015/BE-Lon">https://fluxnet.org/doi/FLUXNET2015/BE-Lon</a> |

## 2.5 Model Intercomparison

370 The performance of T&C-CROP was compared with that of three other leading similar models  
which have been previously validated on the same sites. Specifically, JULES-CROP was  
evaluated on the US-NE1 site for maize, CLM-CROP on the BE-LON site for sugar beet,  
potatoes, and wheat, and ORCHIDEE-CROP on the BE-LON site for wheat. The data for this  
comparison was extracted from published works: Williams et al. (2017) for JULES-CROP, Boas  
375 et al. (2021) for CLM-CROP, and Wu et al. (2016) for ORCHIDEE-CROP. An open-source web-  
based tool, WeplotDigitilizer (see acknowledgements) was used to extract numerical data from  
plot images provided in the publications. Minor discrepancies due to the accuracy of the graph  
digitizer are expected.

380 JULES-CROP was run under conditions of sufficient irrigation (no water stress) and no nitrogen  
limitation. Two model runs were conducted: one where LAI and crop height were prescribed  
from observations, and another where they were not. To ensure a fairer comparison, we used  
results from the latter. In JULES-CROP input parameters were tuned based on site  
observations. In the case of CLM-CROP, the default parameter set for winter wheat () was found  
385 to perform poorly in representing crop phenology across the evaluated sites. Therefore, new  
parameter values were adopted based on literature or site-specific observations. For instance,  
adjustments were made to the growing season length and minimum LAI parameter according  
to field data. All three models—JULES-CROP, CLM-CROP, and ORCHIDEE-CROP—used  
prescribed sowing and harvest dates, except for ORCHIDEE-CROP, where harvest timing was  
390 determined by crop development processes. Notably, the ORCHIDEE-CROP model was not  
calibrated for each site individually but was tested for improvements in a more generic manner.  
Full details regarding the respective model simulation setups and crop-parameter selection can  
be found in the published works as referenced above.



**3.1 Land surface Energy balance**

Across the four selected sites, the model captured the monthly trends in energy fluxes as illustrated in Figure 2. The mean monthly  $r^2$  across sites for net radiation (Rn), sensible (H) and latent heat (QE) was 0.97, 0.85 and 0.96 respectively (Full table available in Supplementary 400 [54](#)). Unpacking this further the across Rn, H and QE mean daily  $r^2$  was 0.68 which is commendable given potential discrepancies in the energy budget closure of flux tower measurements.

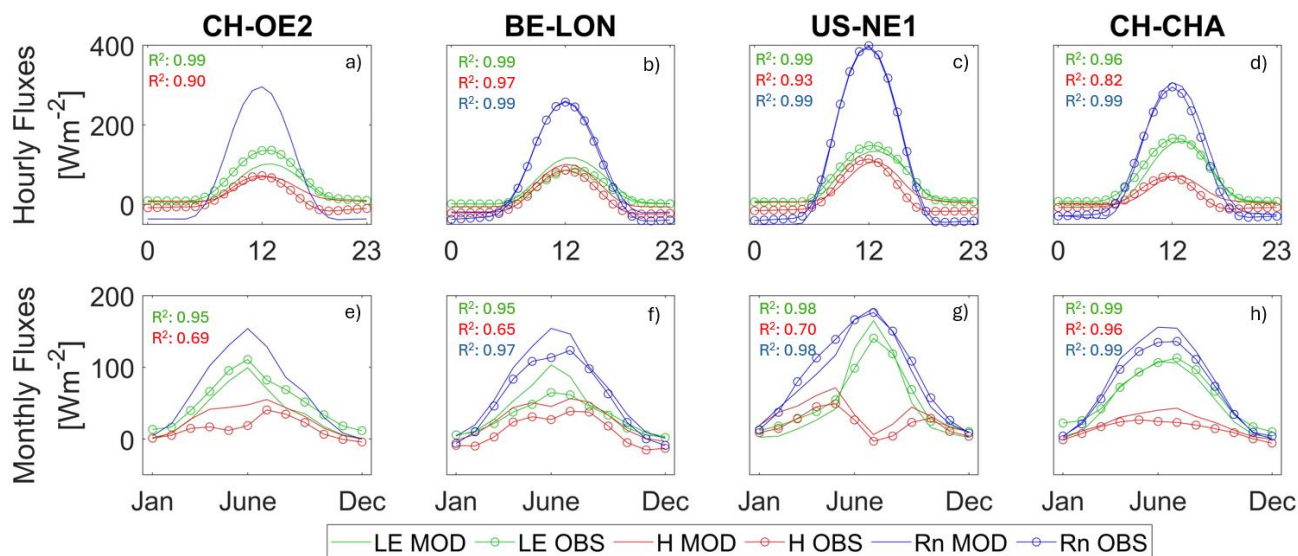

405 **Figure 2** This graph illustrates the comparison between modelled and observed energy fluxes across various sites: CH-CHA (grassland), US-NE1 (maize), CH-OE2, and BE-LON (both with complex crop rotations). The hourly fluxes, representing the average diurnal cycle, are depicted with different colours: green for latent heat flux (LE), red for sensible heat flux (H), and blue for net radiation (Rn).

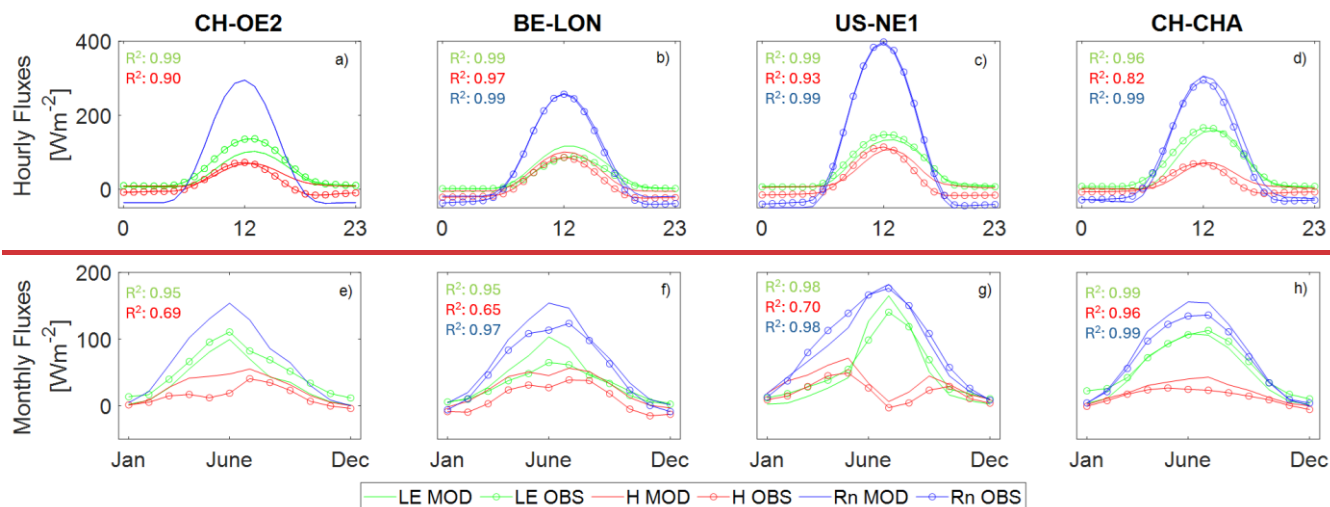

**Figure 2.** This graph illustrates the comparison between modelled and observed energy fluxes across various sites: CH-CHA (grassland), US-NE1 (maize), CH-OE2, and BE-LON (both with complex crop rotations). The hourly fluxes, representing the average diurnal cycle, are depicted with different colours: green for latent heat flux (LE), red for sensible heat flux (H), and blue for net radiation (Rn).

### 3.2 Gross Primary Productivity, Ecosystem Respiration, Net Ecosystem Exchange and Soil Moisture.

We found that to capture the correct timing of GPP fluxes for each crop (Figure 3) it was imperative to draw on a traits-based approach, as lumping different crops into PFTs (Plant Functional Types) performed significantly worse. As illustrated in Figure 3, the magnitude and timings of the GPP fluxes are correctly captured, as are the differences between crops and to a lesser extent between seasons (same crop different year). Additionally, in Table 3 the modelled and observed seasonal sum of gross primary productivity (GPP), ecosystem respiration (RECO) and their difference; net ecosystem exchange (NEE) is presented; a season is defined as the period between crop emergence to harvest. T&C-CROP was able to capture the seasonality of GPP, across crops, within roughly a 10% range of observed values, as depicted in Table 3. Although it did slightly less well at capturing seasonal RECO (Table 3), possibly due to lack of knowledge regarding post-harvest management, ploughing, crop residue etc and of course there exists sometimes notable uncertainty in observed fluxes (Hollinger and Richardson, 2005).

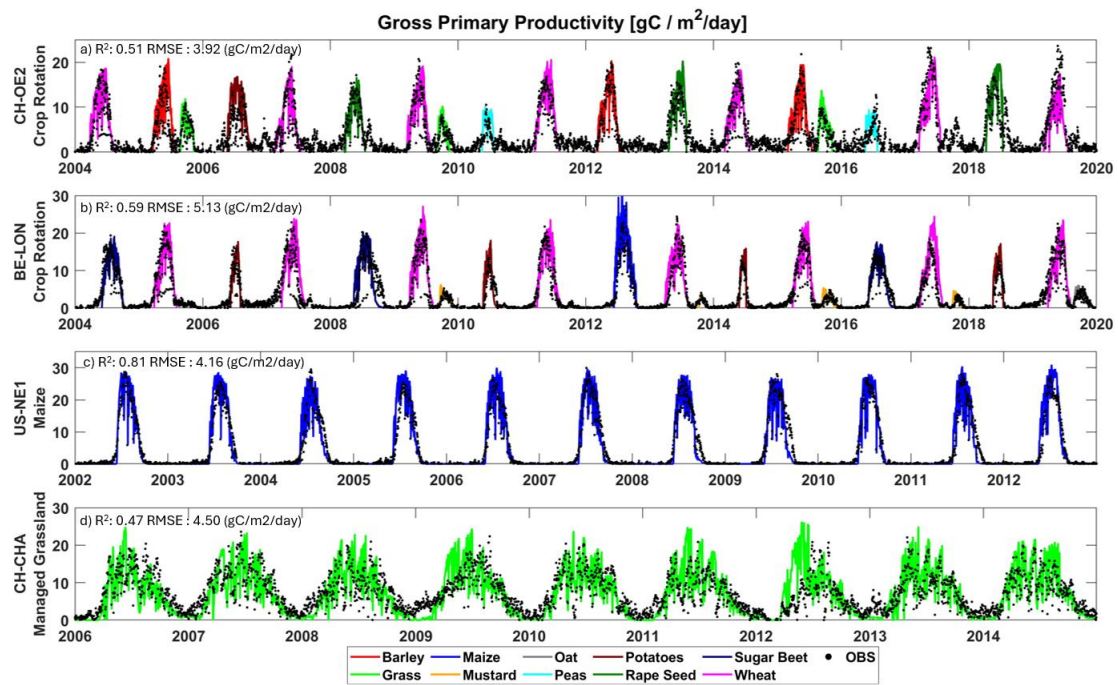

430

**Figure 3** Validation of Gross Primary Productivity (GPP) across the four simulated sites, covering a total of 10 different crops.

435

440

445

450

**Table 3** Illustrating seasonal cumulative sum (sowing-harvest) of T&C-CROP flux estimates (MOD) compared to EC-derived data (OBS) across sites and crops. Note we have also included percentage MOD-OBS differences ( $\Delta$ ). The AVG value corresponds to an absolute average. Note that potatoes in CH\_OE2 were a crop failure event due to hail which is a phenomenon we currently do not simulate therefore we discarded this from computed averages. At the BE\_LON site defoliant was applied to potatoes mid-season, a management which was incorporated into T&C-CROP. At the US\_NE1 site, presented values are the average of all seasons (sowing-harvest) across 2002-2012. At CH\_CHA the presented values are the average of all periods (sowing-harvest) for which we had available site data which was 2006-2020.

| CH-OE2: Crop Averages |                                |                                |                 |                                 |                                  |              |                                |                                 |
|-----------------------|--------------------------------|--------------------------------|-----------------|---------------------------------|----------------------------------|--------------|--------------------------------|---------------------------------|
| CROP                  | MODGPP<br>(gC/m <sup>2</sup> ) | OBSPGP<br>(gC/m <sup>2</sup> ) | $\Delta$<br>(%) | MODRECO<br>(gC/m <sup>2</sup> ) | OBSPRECO<br>(gC/m <sup>2</sup> ) | $\Delta$ (%) | MODNEE<br>(gC/m <sup>2</sup> ) | OBSPNEE<br>(gC/m <sup>2</sup> ) |
| Wheat                 | 1153                           | 1300                           | -11             | 722                             | 751                              | -4           | -431                           | -504                            |
| Barley                | 1127                           | 1069                           | 5               | 662                             | 575                              | 15           | -465                           | -408                            |
| Cover                 | 433                            | 414                            | 5               | 294                             | 308                              | -5           | -139                           | -75                             |
| Rape Seed             | 1254                           | 1098                           | 14              | 749                             | 888                              | -16          | -505                           | -366                            |
| Peas                  | 377                            | 386                            | -2              | 187                             | 527                              | -65          | -190                           | -366                            |
| Potato*               | 1477                           | 935                            | 58              | 772                             | 980                              | -21          | -706                           | 199                             |
| AVG                   |                                |                                | 9               |                                 |                                  | 10           |                                |                                 |
| BE-LON: Crop Averages |                                |                                |                 |                                 |                                  |              |                                |                                 |
| Crop                  | MODGPP<br>(gC/m <sup>2</sup> ) | OBSPGP<br>(gC/m <sup>2</sup> ) | $\Delta$<br>(%) | MODRECO<br>(gC/m <sup>2</sup> ) | OBSPRECO<br>(gC/m <sup>2</sup> ) | $\Delta$ (%) | MODNEE<br>(gC/m <sup>2</sup> ) | OBSPNEE<br>(gC/m <sup>2</sup> ) |
| Sugar Beet            | 1353                           | 1455                           | -7              | 537                             | 664                              | -19          | -816                           | -808                            |
| Wheat                 | 1526                           | 1496                           | 2               | 801                             | 887                              | -10          | -725                           | -570                            |
| Potato*               | 531                            | 556                            | -5              | 236                             | 454                              | -48          | -294                           | -149                            |
| Mustard               | 192                            | 162                            | 19              | 94                              | 204                              | -54          | -99                            | 43                              |
| Maize                 | 1876.3                         | 1492.9                         | 25.7            | 951.8                           | 963.2                            | -1.2         | -924                           | -595.4                          |
| Oat                   | 280                            | 288                            | -2              | 169                             | 299                              | -43          | -168                           | 16                              |
| AVG                   |                                |                                | 11              |                                 |                                  | 31           |                                |                                 |
| US-NE1                |                                |                                |                 |                                 |                                  |              |                                |                                 |
| Crop                  | MODGPP<br>(gC/m <sup>2</sup> ) | OBSPGP<br>(gC/m <sup>2</sup> ) | $\Delta$<br>(%) | MODRECO<br>(gC/m <sup>2</sup> ) | OBSPRECO<br>(gC/m <sup>2</sup> ) | $\Delta$ (%) | MODNEE<br>(gC/m <sup>2</sup> ) | OBSPNEE<br>(gC/m <sup>2</sup> ) |
| Maize                 | 1785                           | 1668                           | 7               | 731                             | 1161                             | -37          | -1054                          | -566                            |
| CH-CHA                |                                |                                |                 |                                 |                                  |              |                                |                                 |
| Crop                  | MODGPP<br>(gC/m <sup>2</sup> ) | OBSPGP<br>(gC/m <sup>2</sup> ) | $\Delta$<br>(%) | MODRECO<br>(gC/m <sup>2</sup> ) | OBSPRECO<br>(gC/m <sup>2</sup> ) | $\Delta$ (%) | MODNEE<br>(gC/m <sup>2</sup> ) | OBSPNEE<br>(gC/m <sup>2</sup> ) |
| Grass                 | 708                            | 763                            | 12.7            | 612                             | 560                              | 57           | -156                           | -58                             |

T&C-Crop's skill in simulating Soil Water Content (SWC) is illustrated in Figure 4. The maize monoculture site (US-NE1) along with the crop rotation site (BE-LON) were chosen for this illustration due to their long observational SWC record. At a depth of 25cm, a correlation coefficient of  $r^2 = 0.64$  was achieved between daily observed and modelled SWC at the US-NE1 site, a similar value of 0.62 is achieved at the BE-LON site (if we only include data until the sensor change in 2015).

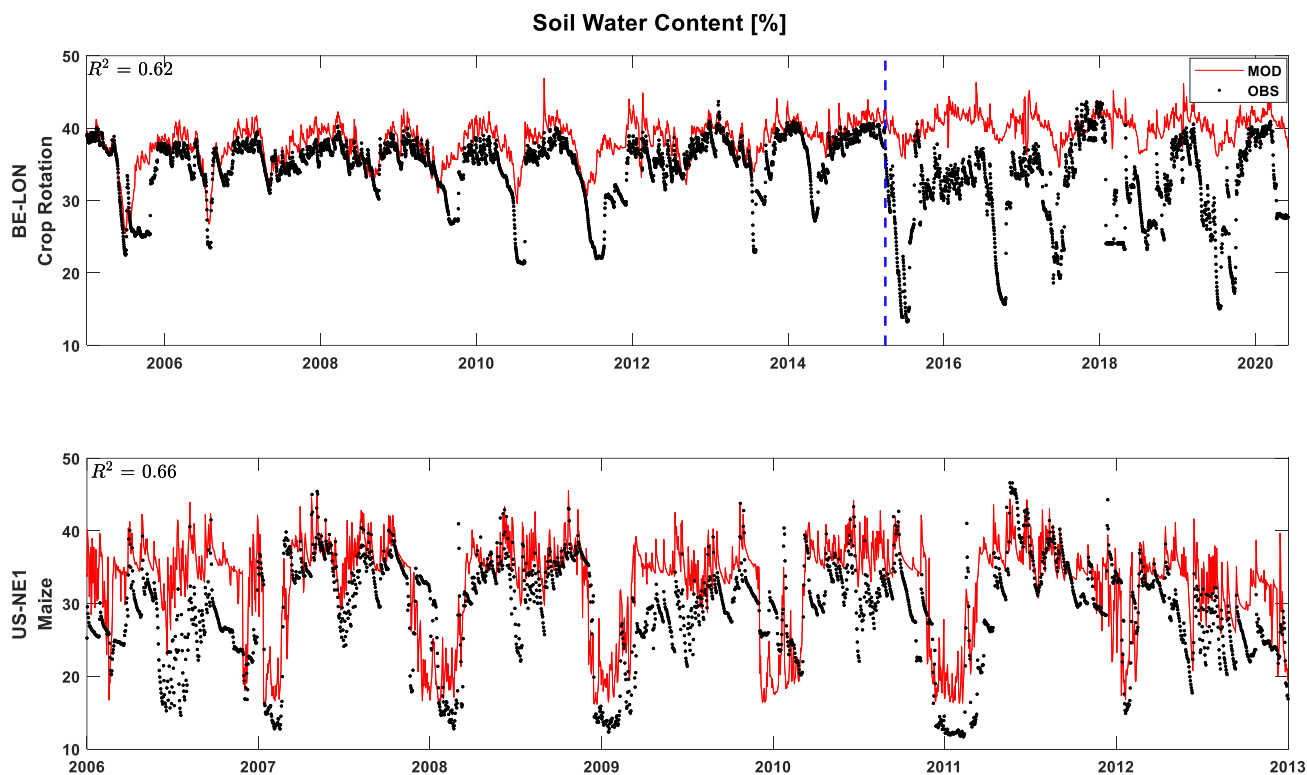

470 **Figure 4** Validation of Soil Water Content (SWC) across BE-LON, complex crop rotation and US-NE1, maize monoculture. Both sites represent modelled and observed SWC at a depth of 25cm. The dashed blue line represents the date of a sensor change

475

### 3.3 Crop development: LAI and Biomass Growth

T&C-CROP was able to capture the timing of leaf flushing and growing season length across various simulated sites and crop types (Figure 5). The model demonstrated considerable skill in reproducing peak season Leaf Area Index (LAI), indicated by a correlation coefficient ( $r^2$ ) of 0.75, 0.66 and 0.61 for CH\_OE2, BE\_LON and USNE1 respectively. However, on CH-CHA, grassland site, whilst the leaf growth pattern was clearly captured, there was no significant correlation between observed and simulated peak LAI, likely due to the spread in recorded LAI values on each date. Importantly, T&C-CROP successfully captured most differences in LAI among different crops; most clearly depicted with mustard and wheat at the BE-LON site (Figure 5, panel b). The model's strongest performance was in replicating LAI dynamics at the US-NE1 maize monoculture, achieving an  $r^2$  of 0.77, a satisfactory result considering the limited developments to T&C-CROP and inherent heterogeneity in field-based LAI sampling and different cultivars sown.

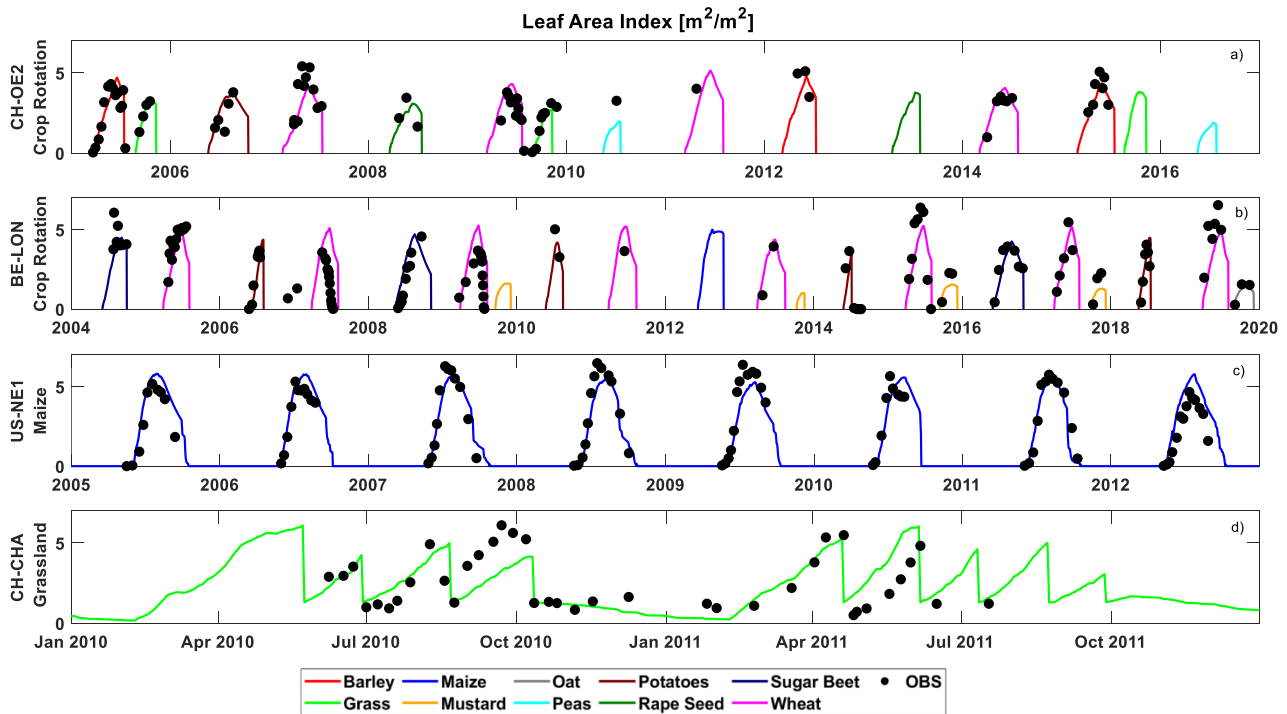

Figure 5 Validation of Leaf Area Index (LAI) across the four simulated sites.

The validation of T&C-CROP against observed crop harvests (Table 4) demonstrates the  
495 model's ability to accurately capture biomass differences at harvest time among various crops  
and effectively partition assimilated carbon into different crop components, such as stems and  
grains. Across the four simulated sites, T&C-CROP successfully predicted the annual harvested  
aboveground biomass (AGB) within approximately 20% of the observed values, with a few  
exceptions (Table 4).

500

We also assessed dynamic carbon allocation mechanisms throughout the growing season at  
the US-NE1 site, using published observations (Peng et al. 2018) as a reference (Figure 6). Our  
findings indicate that T&C-CROP effectively captures the overall trend and magnitude of carbon  
allocation to specific crop components such as leaves, stems, and grains. This underscores the  
505 model's promising ability to represent the dynamic processes that drive crop growth and  
development. Regarding Figure 6, it is important to note that in 2007 at the US-NE1 site, our  
modelled above-ground carbon (AGC) was slightly lower than observed, peaking at 9.5 t C/ha  
compared to the observed 11.34 t C/ha (Fig. 7a).

510 We analysed crop rotations at two sites, CH-OE2 and BE-LON, and also evaluated T&C-  
CROP's performance on maize at the US-NE1 site and grassland at the CH-CHA site. At the  
CH-OE2 site, we simulated 19 crop cycles over fifteen years (2004-2019). On average, the  
harvested aboveground biomass (AGB) was simulated within 10% of recorded values. Grain  
and straw were simulated within 13% and 30% of recorded values, respectively. However, inter-  
515 annual variation in crop growth and carbon allocation to different pools (grain/straw) were  
difficult to capture.

At the BE-LON site, we simulated 21 crop cycles over sixteen years (2004-2020). Winter wheat  
and maize were well simulated, with AGB and grain values, on average, within 10% of  
520 observations. Straw was slightly overestimated, by 27% for wheat and 13% for maize. If we

account for crop residues, particularly the first few centimetres of straw, our simulated values could align more closely with observed values. Additionally, including the belowground component of sapwood, which is currently excluded, would likely bring simulated AGB values even closer to observations. For wheat, the average residue at BE-LON was 26% of AGB, with a standard deviation of 4%. Potatoes at BE-LON were more challenging to simulate accurately, partly due to the defoliant treatment applied in mid-August, which is not currently included in our model. This resulted in simulated tuber biomass (daughter tubers) being about 50% lower than observed.

Over eleven years (2002-2012) at the US-NE1 site, simulated maize yield (kernel) was within 8% of recorded values on average. For the grassland site CH-CHA, harvest data was available for eight cuts from 2008 to 2010. Here simulated harvested biomass was within 20% of recorded values on average. Full results in a tabular format are included in supplementary [54](#).

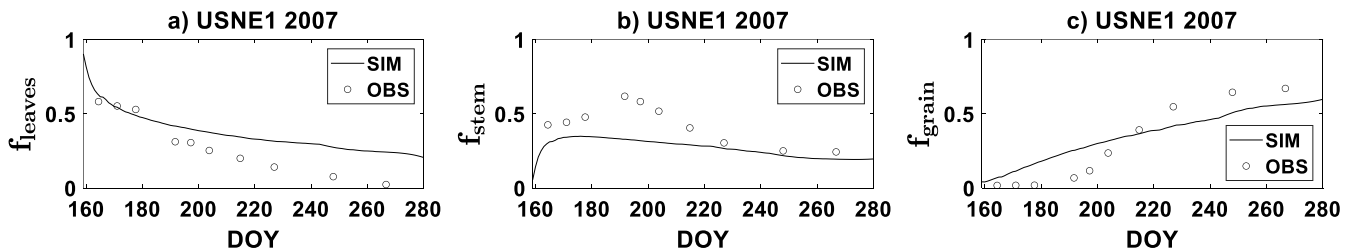

**Figure 6** Total fraction of above-ground biomass in leaves, stems, and grain at the maize site (US\_NE1), illustrating the partitioning of assimilated carbon by T&C. Leaves are represented by the "foliage" pool, stems include sapwood and dead sapwood pools, and grain consists of carbohydrate reserves, fruit and flower pools. Observed values are derived from the graphs in the supplementary material of Peng et al. (2018).

540

545



**Table 4** In T&C-Crop, crop carbon is distributed across six distinct biomass carbon pools: B1=Foliage, B2=Living Sapwood, B3=Fine Roots, B4=Carbohydrate Reserves, B5=Fruit and Flowers, and B6=Standing Dead Foliage. In Table 4, Simulated Above Ground Biomass (AGB) corresponds to the sum of all T&C-Crop's biomass pools excluding B3 (Fine Roots); we assume that all sapwood is aboveground, an approximation which is reasonable for most crops. Simulated Grain is represented by the sum of B5 (Fruit and Flowers) and B4 (Carbohydrate Reserves), which are expected to be contained mostly within the fruits for a crop, and simulated straw is derived from the sum of B1 (Foliage), B2 (Living Sapwood), and B6 (Standing Dead Foliage). Validation for belowground biomass (roots) was not possible due to the absence of on-site data. Note that for US-NE1, a value of 43%, as suggested by the PI, was used to translate  $t\ ha^{-1}$  to  $t\ C\ ha^{-1}$ . For CH-CHA grass yields are annual from 2008-2010. \* Note that in CH-OE2 OBS AGB refers to the total AGB at the time of harvest whereas in BE-LON C Exported refers to the harvested component of the AGB. All values are in  $t\ C\ ha^{-1}$ .

#### CH-OE2 Yields

| Crop         | OBS AGB<br>( $t\ C\ ha^{-1}$ ) | SIM<br>AGB | $\Delta$<br>(%) | OBS<br>STRAW | SIM<br>STRAW | $\Delta$<br>(%) | OBS<br>GRAIN | SIM<br>GRAIN | $\Delta$ (%) |
|--------------|--------------------------------|------------|-----------------|--------------|--------------|-----------------|--------------|--------------|--------------|
| Wheat        | 4.3                            | 3.7        | 14.0            | 1.7          | 1.3          | 23.5            | 2.6          | 2.4          | -7.7         |
| Barley       | 3.9                            | 3.9        | 0.0             | 0.7          | 1.2          | 71.4            | 3.2          | 2.7          | -15.6        |
| Rape<br>Seed | /                              | /          | /               | /            | /            | /               | 2.0          | 2.2          | 10           |
| Peas         | /                              | /          | /               | /            | /            | /               | 3.5          | 6.1          | 74.3         |

#### BE-LON Yields

| Crop          | C<br>Exported | SIM<br>AGB | $\Delta$<br>(%) | OBS<br>STRAW | SIM<br>STRAW | $\Delta$<br>(%) | OBS<br>GRAIN | SIM<br>GRAIN | $\Delta$ (%) |
|---------------|---------------|------------|-----------------|--------------|--------------|-----------------|--------------|--------------|--------------|
| Sugar<br>Beet | /             | /          | /               | /            | /            | /               | 8.9          | 6.9          | -22.5        |
| Wheat         | 5.5           | 5.9        | -6.0            | 1.8          | 2.5          | 27.0            | 3.7          | 3.5          | -5.4         |
| Potato        | /             | /          | /               | /            | /            | /               | 3.3          | 2.2          | -33.3        |
| Maize         | 7.8           | 7.2        | 7.1             | 3.6          | 4.2          | 13.4            | 4.2          | 4.2          | 0.0          |

#### US-NE1 Yields

|       |   |   |   |   |   |   |     |     |       |
|-------|---|---|---|---|---|---|-----|-----|-------|
| Maize | / | / | / | / | / | / | 5.5 | 4.9 | -10.9 |
|-------|---|---|---|---|---|---|-----|-----|-------|

#### CH-CHA

|       |      |      |      |   |   |   |   |   |   |
|-------|------|------|------|---|---|---|---|---|---|
| Grass | 0.85 | 1.00 | 17.6 | / | / | / | / | / | / |
|-------|------|------|------|---|---|---|---|---|---|

### 3.5 Model Intercomparison

570 T&C-CROP simulations were compared to those of JULES-CROP (Williams et al. 2017). Figures 7 and 8 illustrate how both models, relative to each other represent AGB and LAI over a course of eight years at the Maize (US-NE1) site. Despite T&C-CROP being arguably more process-based and more parameter parsimonious, both models did a comparable job at capturing the correct magnitude and timing of LAI and AGB, neither model correctly simulated inter-annual variations in peak LAI or AGB.

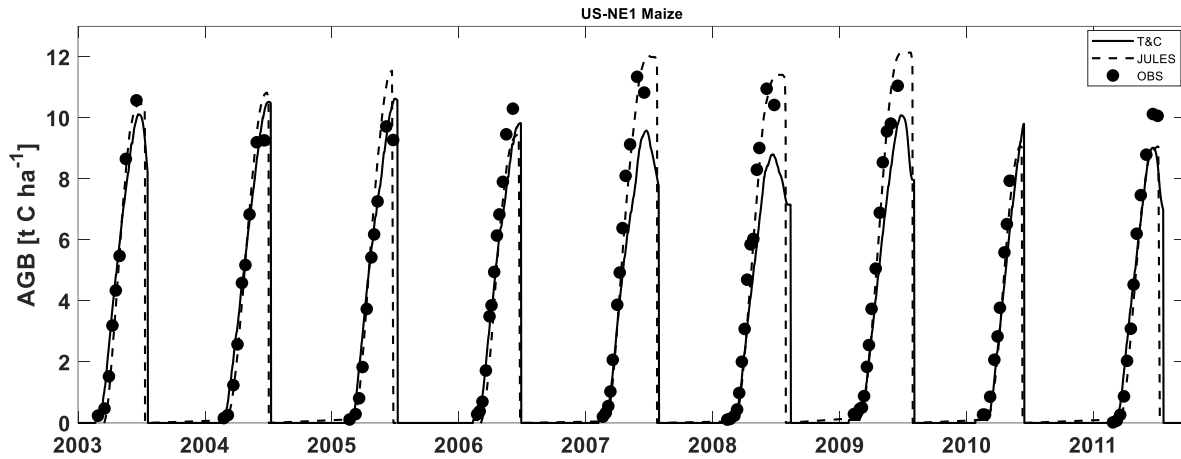

575 **Figure 7** [Simulation of above ground biomass by both T&C-CROP and JULES-CROP models compared to observations on the US-NE1 Maize site.](#)

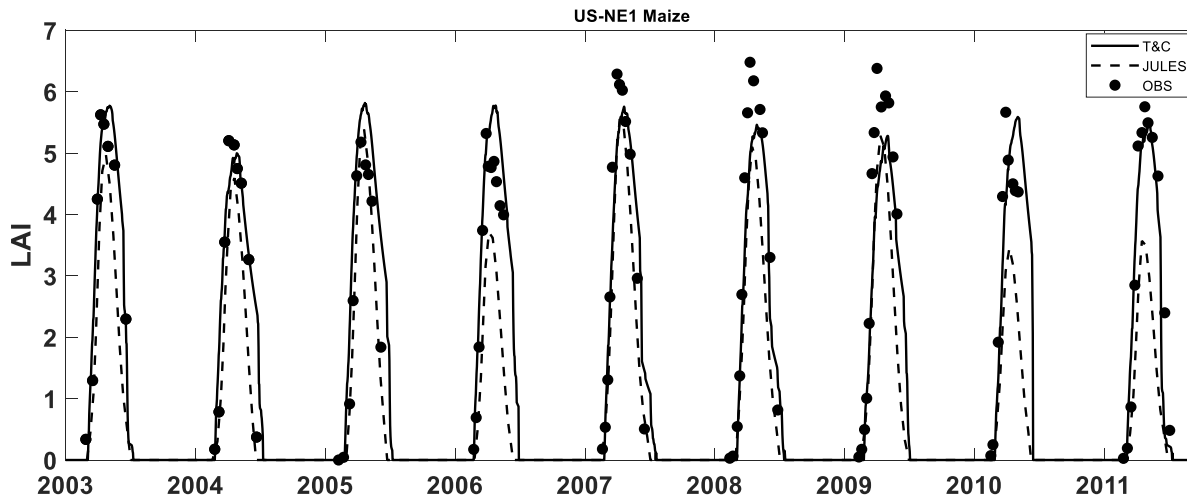

**Figure 8** [Simulation of LAI by both T&C-CROP and JULES-CROP models compared to observations on the US-NE1 Maize site.](#)

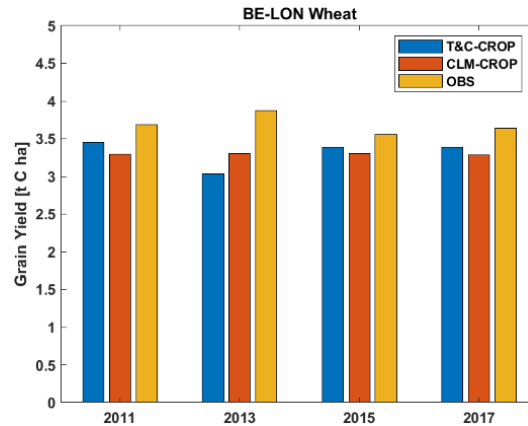

**Figure 9** Side by side comparison of CLM-CROP and T&C-CROP.

T&C-CROP simulations conducted over the crop rotation site BE-LON were compared to those of CLM-CROP (Boas et al. (2021)). Figure 9 illustrates how both models simulate grain yields for winter wheat across the four years which were presented in the CLM-CROP paper. To produce this comparison, we converted CLM-CROPS' modelled values, which are reported in T DM ha<sup>-1</sup> to T C ha<sup>-1</sup> using the average site-reported C content per unit of dry mass for wheat grain during these four years which was 40.5%; there was little interannual variation in this value, (<3%). Unfortunately, there is not sufficient data or variation in grain yield to truly assess the efficacy of either model, however, based on the presented observations, both capture the correct magnitude but neither capture the inter-annual observations in yield. Figure 10 illustrates how both models successfully represent LAI as well as key land surface fluxes over the years for which sugar beet and potatoes were sown. Note that a defoliant was applied to potatoes at the BE-LON site (Aubinet et al., 2009). To replicate this in T&C-CROP, we simulated a sudden "cut" on the recorded date of defoliant application.

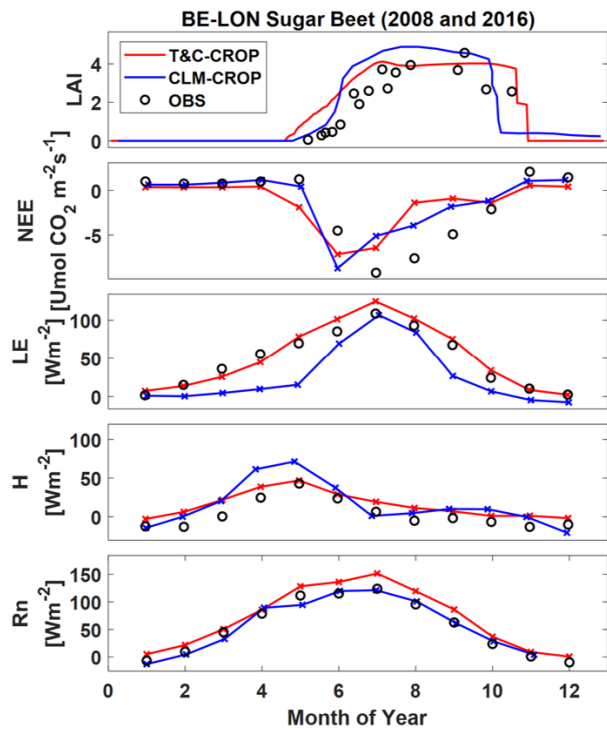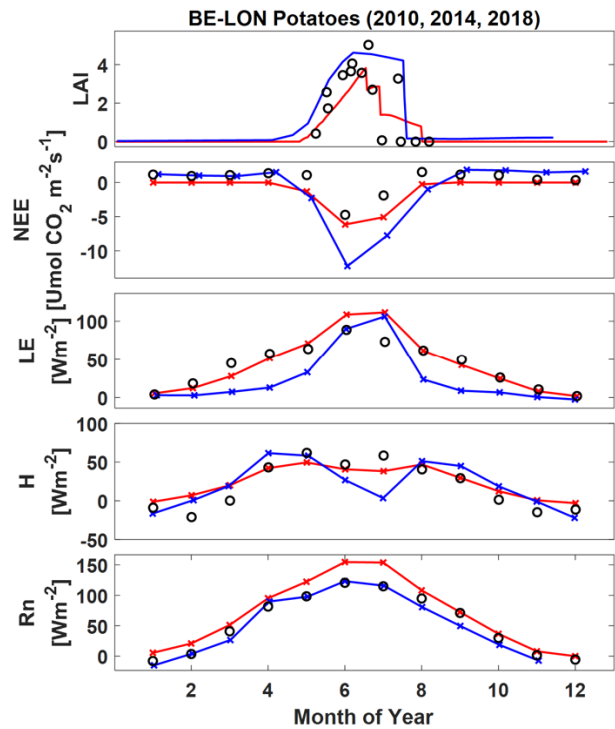

600 **Figure 10** Simulation of Leaf Area Index (LAI), Net Ecosystem Exchange (NEE), latent heat flux (LE), sensible heat flux (HE) and net radiation (Rn) across both T&C-CROP and CLM-CROP for Sugar Beet and Potatoes cultivated at the BE-LON site.

605

610

615 Lastly, T&C-CROP was evaluated against results from ORCHIDEE-CROP (Wu et al. 2016) for  
 the winter wheat season on the BE-LON site in 2006 (Figure 11). ORCHIDEE-CROP (Wu et  
 al. 2016) undershoots above ground biomass (AGB) by about 50% whilst T&C-CROP does a  
 much better job, albeit overshooting AGB by just under 10%. More specifically, T&C-CROP  
 achieved a correlation coefficient of  $r^2 = 0.94$  between simulated and observed AGB whilst this  
 620 was 0.2 for ORCHIDEE-CROP.

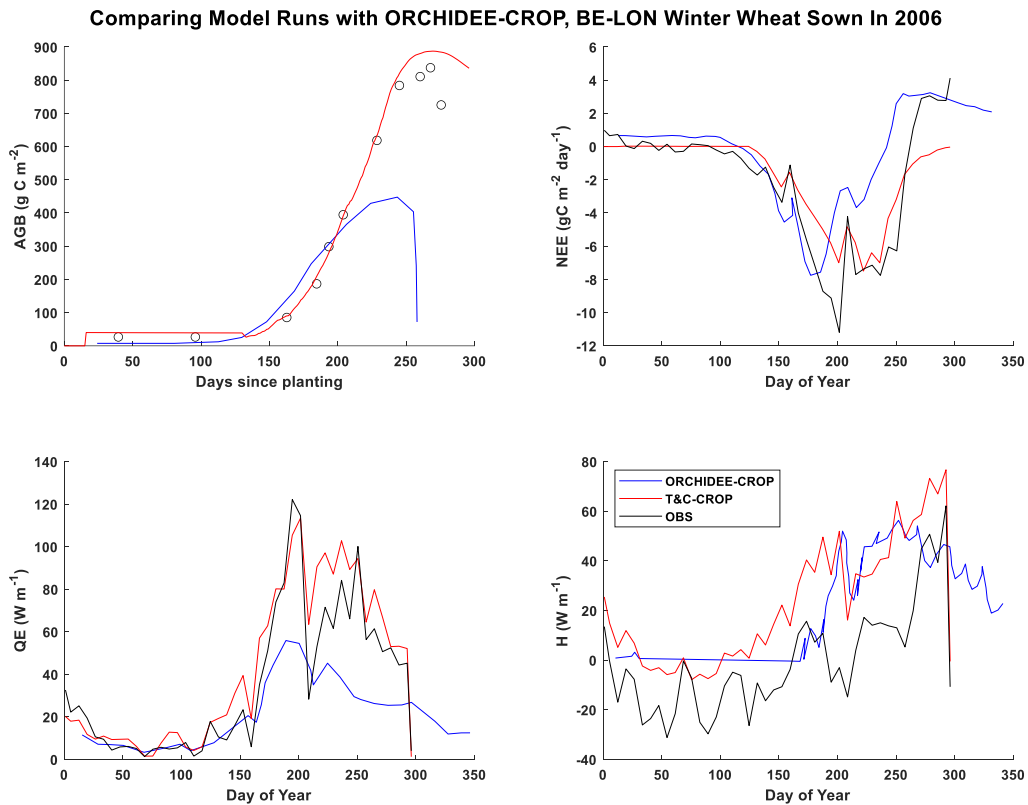

625 **Figure 11** Illustrating a comparison of ORCHIDEE-CROP outputs from Wu et al. 2016 and T&C-CROP outputs from this  
 paper for Winter Wheat sown in BE-LON. Note that both Latent (QE) and Sensible Heat (H) were smoothed using a weekly  
 time step to improve graph readability. Note AGB here refers to total, not only harvestable AGB.

#### 4. Discussion

The integration of three new crop-specific parameters, combined with streamlined model developments, has significantly enhanced the representation of cropland sites in T&C-CROP.

630 Our findings include the successful validation of over ten different crops sown in four heterogeneous agricultural fields, varying in both management practices and climate conditions. Results also demonstrate that T&C-CROP performs comparably to other leading terrestrial biosphere models (TBMs) without having to increase model complexity or introduce crop-specific carbon pools. This underscores the effectiveness of T&C-CROP as a highly parameter-  
635 efficient and process-based model for future studies.

This improved incorporation of croplands into T&C opens new avenues for modelling land-surface interactions, hydrology, carbon fluxes, and crop yields. For instance, the enhanced representation of sensible heat (H), latent heat (LE), and net radiation (Rn) facilitates more  
640 detailed research on land surface interactions. Similarly, improved modelling of evapotranspiration (ET) and leaf area index (LAI) supports hydrological and water sustainability studies (e.g., Bonetti et al. 2022). Additionally, greater accuracy in net ecosystem exchange (NEE) and soil carbon storage could aid contemporary carbon emission mitigation efforts.

645 The hydrological and carbon storage implications of land-use transitions - such as the conversion of crops, forests, and pastures—are among key applications foreseen for T&C-CROP. Further studies could also focus on optimizing field management practices, building on prior work with models like the DNDC biogeochemical model (Zhang et al., 2019). Applications might include investigating irrigation strategies and fertilizer use under changing climatic  
650 conditions (e.g., Botter et al 2021). These research directions align with efforts to assess climate risk in agriculture and, ultimately, to develop climate-smart agricultural practices.~~involving crop, forest, pasture conversion, as well studies on optimising field management ( such as irrigation and fertilizer application in a changing climate are among the foreseen applications of T&C-CROP.~~

Additionally, beyond the biomass, hydrological and energy balance metrics validated in the results section, T&C-CROP can also simulate belowground soil biogeochemical dynamics (Fatichi et al., 2019). We have included some outputs for illustrative purposes (Supplementary [76](#)). T&C-CROP captures changes in nutrient leakage as a function of local weather, crop type, fertilizer regime, and legacies. Using the biogeochemistry module, we identified a boost in microbial carbon post-harvest, nutrient flushing following fertilization, and predominantly after rainfall events.

Whilst we remain confident in T&C-CROP's strength at the field scale, particularly as we move toward an increasingly data-rich future—where the integration of data-driven and process-based approaches to crop modelling will enhance predictive capabilities - the utility/potential of a versatile tool like T&C-CROP presently lies in its ability to perform at the regional scale. However, validating its efficacy at this level presents significant challenges due to sparse comprehensive data and the multitude of factors influencing crop growth, including socio-economic variables.

Many of the issues we encountered during site-level validations are expected to diminish at broader scales, as local variations average out and climatic variables assume greater importance. For instance, representing microscale field management proved challenging during validation efforts. Accounting for different cultivar types, accurately determining crop-specific carbon allocation parameters, incorporating practices - such as the use of growth regulators, defoliant or fungicide treatments (e.g., at sites like BE-LON; Dugranne et al., 2011), or addressing hail damage (e.g., at CH-OE2; Revill et al., 2016) - proved difficult. Moreover, T&C-CROP struggled to simulate post-harvest processes, likely due to insufficient knowledge of practices such as residue management and soil preparation or tillage.

These factors, while critical at the field scale, are likely to exert less influence on crop growth across larger spatial scales, where climatic conditions are expected to dominate. Nonetheless, addressing these challenges could improve model performance at all scales. It is also worth noting that our manual trial-and-error calibration of crop parameters (within a  $\pm 30\%$  range of literature values) could be likely improved using systematic calibration techniques to achieve more robust validation. However, this was beyond the scope of this introductory paper due to the substantial computational resources required, particularly given the high dimensionality of T&C-CROP. Advancing in this direction would significantly enhance the precision of model outputs and remains an important objective for future work.

## 5. Conclusion

T&C-CROP was introduced to enhance T&C's representation of croplands and associated carbon, energy and nutrient fluxes. In this study we have assessed the extent to which T&C-CROP accurately depicts crop growth and associated land surface fluxes across four distinct agricultural sites CH-OE2, BE-LON, CH-CHA, US-NE1. Each site was subject to varying management practices such as irrigation, fertilizer and defoliant application and had several types of crops, either as a monoculture or as a crop rotation scheme. Our model validation covers over 50 years and 61 crop cycles, encompassing more than nine staple crops and also included comparison with results from other leading TBMs.

This study demonstrates how with minimal model structural changes and only three additional parameters, it is possible to accurately represent Gross Primary Productivity (GPP), LAI (Leaf Area Index) and organ-specific harvests not only in monocultures but also in sites with complex crop rotations and diverse management practices. Of particular novelty we adapted the carbon allocation scheme for crops and implemented a novel routine which allowed for multiple cropping cycles within one calendar year within the same model run. This enhancement enables more realistic simulations of field dynamics.



710 Our approach with T&C-CROP is grounded in practical utility. While our validation efforts were thorough, they were not overly fixated on meticulously simulating variables such as yield, considering that this is only one of the many model outputs. We were realistic with limitations in parameter constraints as a high-level granularity was not a primary objective. We prioritized broad applicability over micromanagement details like cultivar choice, which is unlikely available  
715 at larger scales.

T&C-CROP's research horizon is to explore in a single model the concurrent effects of various crops on yields, energy dynamics, and carbon fluxes, as well as assessing how major climatic factors (temperature, precipitation, CO<sub>2</sub>, relative humidity, etc.) interact with management  
720 practices (fertilizer, irrigation) to influence crop yields but also byproducts such as nutrient runoff, soil degradation, and carbon sequestration.

Future studies with T&C-CROP are envisioned to be conducted over broader spatial scales, where detailed management practices or specific cultivar information are less important. T&C-  
725 CROP's ability to capture geographical differences induced by climate and soil properties are expected to overshadow local variations due to specific cultivars or management practices. This capability makes it an invaluable tool for understanding and predicting large-scale environmental patterns and their implications.

730

735

## 6. References

- Ansarifar, J., Wang, L., and Archontoulis, S.V.: An interaction regression model for crop yield prediction, *Sci. Rep.*, 11, 17754, <https://doi.org/10.1038/s41598-021-97221-7>, 2021.
- 740 Amanullah: Specific leaf area and specific leaf weight in small grain crops wheat, rye, barley, and oats differ at various growth stages and NPK source, *J. Plant Nutr.*, 38(11), 1694–1708, <https://doi.org/10.1080/01904167.2015.1017051>, 2015.
- Aubinet, M., Moureaux, C., Bodson, B., Dufranne, D., Heinesch, B., Suleau, M., Vancutsem, F., and Vilret, A.: Carbon sequestration by a crop over a 4-year sugar beet/winter wheat/seed potato/winter wheat rotation cycle, *Agric. For. Meteorol.*, 149(3–4), 407–418, <https://doi.org/10.1016/j.agrformet.2008.09.003>, 2009.
- 745 Bilonis, I., Drewniak, B. A., and Constantinescu, E. M.: Crop physiology calibration in the CLM, *Geosci. Model Dev.*, 8, 1071–1083, <https://doi.org/10.5194/gmd-8-1071-2015>, 2015.
- Boas, T., Bogen, H., Grünwald, T., Heinesch, B., Ryu, D., Schmidt, M., Vereecken, H., Western, A., and Hendricks Franssen, H.-J.: Improving the representation of cropland sites in the Community Land Model (CLM) version 5.0, *Geosci. Model Dev.*, 14, 573–601, <https://doi.org/10.5194/gmd-14-573-2021>, 2021.
- 750 Bonan, G. B., Lawrence, P. J., Oleson, K. W., Levis, S., Jung, M., Reichstein, M., ... and Swenson, S. C.: Improving canopy processes in the Community Land Model version 4 (CLM4) using global flux fields empirically inferred from FLUXNET data, *J. Geophys. Res.: Biogeosciences*, 116(G2), <https://doi.org/10.1029/2010JG001593>, 2011.
- 755 [Bonetti, S., Sutanudjaja, E. H., Mabhaudhi, T., Slotow, R., and Dalin, C.: Climate change impacts on water sustainability of South African crop production, \*Environ. Res. Lett.\*, 17, 084017, <https://doi.org/10.1088/1748-9326/ac80cf>, 2022.](https://doi.org/10.1088/1748-9326/ac80cf)
- Botter, M., Zeeman, M., Burlando, P., and Fatichi, S.: Impacts of fertilization on grassland productivity and water quality across the European Alps under current and warming climate: insights from a mechanistic model, *Biogeosciences*, 18, 1917–1939, <https://doi.org/10.5194/bg-18-1917-2021>, 2021.
- 760 Boote, K. J., Jones, J. W., White, J. W., Asseng, S., and Lizaso, J. I.: Putting mechanisms into crop production models, *Plant Cell Environ.*, 36(9), 1658–1672, <https://doi.org/10.1111/pce.12119>, 2013.
- Buysse, P., Bodson, B., De Debaets, A., Ligne, A., Heinesch, B., Manise, T., Moureaux, C., and Aubinet, M.: Carbon budget measurement over 12 years at a crop production site in the silty-loam region in Belgium, *Agric. For. Meteorol.*, 246, 241–255, <https://doi.org/10.1016/j.agrformet.2017.07.004>, 2017.
- 765 Cammarano, D., Jamshidi, S., Hoogenboom, G., et al.: Processing tomato production is expected to decrease by 2050 due to the projected increase in temperature, *Nat. Food*, 3, 437–444, <https://doi.org/10.1038/s43016-022-00521-y>, 2022.
- 770 Cassman, K. G., Grassini, P.: A global perspective on sustainable intensification research, *Nat. Sustain.*, 3, 262–268, <https://doi.org/10.1038/s41893-020-0507-8>, 2020.

- 775 Cernusak, L. A.: Gas exchange and water-use efficiency in plant canopies, *Plant Biology*, 22, 52–67, <https://doi.org/10.1111/plb.12939>, 2020.
- Dai, Y., Dickinson, R. E., and Wang, Y.-P.: A two-big-leaf model for canopy temperature, photosynthesis, and stomatal conductance, *J. Climate*, 17, 2281–2299, [https://doi.org/10.1175/1520-0442\(2004\)017<2281>2.0.CO;2](https://doi.org/10.1175/1520-0442(2004)017<2281>2.0.CO;2), 2004.
- 780 Dietiker, D., Buchmann, N., and Eugster, W.: Testing the ability of the DNDC model to predict CO<sub>2</sub> and water vapour fluxes of a Swiss cropland site, *Agric. Ecosyst. Environ.*, 139, 396–401, <https://doi.org/10.1016/j.agee.2010.09.002>, 2010.
- 785 Drewniak, B., Song, J., Prell, J., Kotamarthi, V. R., and Jacob, R.: Modeling agriculture in the Community Land Model, *Geosci. Model Dev.*, 6, 495–515, <https://doi.org/10.5194/gmd-6-495-2013>, 2013.
- Dufranne, D., Moureaux, C., Vancutsem, F., Bodson, B., and Aubinet, M.: Comparison of carbon fluxes, growth, and productivity of a winter wheat crop in three contrasting growing seasons, *Agric. Ecosyst. Environ.*, 141, 133–142, <https://doi.org/10.1016/j.agee.2011.02.023>, 2011.
- 790 Dumont, B., Heinesch, B., Bodson, B., Bogaerts, G., Chopin, H., De Ligne, A., Demoulin, L., Douxfils, B., Engelmann, T., Faurès, A., Longdoz, B., Manise, T., Orgun, A., Piret, A., Thyron, T. (2023). ETC L2 Fluxnet (half-hourly), Lonzee, 2017-12-31–2022-12-31, ICOS RI, [https://hdl.handle.net/11676/7Myt-Cd6euRxT14\\_r0Aakb\\_-](https://hdl.handle.net/11676/7Myt-Cd6euRxT14_r0Aakb_-)
- 795 Dury, S., Bendjebbar, P., Hainzelin, E., Giordano, T., and Bricas, N. (eds.): *Food Systems at Risk: New Trends and Challenges*, FAO, CIRAD, and European Commission, Rome, Montpellier, Brussels, <https://doi.org/10.19182/agritrop/00080>, 2019.
- 800 Ecosystem Thematic Centre, Buchmann, N., Emmel, C., Eugster, W., Maier, R. (2021). Fluxnet Product, Oensingen crop, 2003-12-31–2020-12-31, Miscellaneous, <https://hdl.handle.net/11676/7o7qStJ9sUOaao-2IDL1XvX>
- Eurostat: *Agriculture, forestry and fishery statistics*, 2020 edition, European Union, <https://0.2785/496803>, 2020
- 805 FAO, IFAD, UNICEF, WFP, and WHO: *The State of Food Security and Nutrition in the World 2022. Repurposing Food and Agricultural Policies to Make Healthy Diets More Affordable*, FAO, Rome, <https://doi.org/10.4060/cc0639en>, 2022.
- Fatichi, S., Ivanov, V. Y., and Caporali, E.: Simulation of future climate scenarios with a weather generator, *Adv. Water Resour.*, 34, 448–467, <https://doi.org/10.1016/j.advwatres.2010.12.013>, 2011.
- 810 Fatichi, S., Ivanov, V. Y., and Caporali, E.: A mechanistic ecohydrological model to investigate complex interactions in cold and warm water-controlled environments: 1. Theoretical framework and plot-scale analysis, *J. Adv. Model. Earth Syst.*, 4, <https://doi.org/10.1029/2011MS000086>, 2012.
- 815 Fatichi, S., Leuzinger, S. and Körner, C., 2014. Moving beyond photosynthesis: from carbon source to sink-driven vegetation modeling. *New Phytologist*, 201(4), pp.1086-1095. /doi/10.1111/nph.12614

- 820 Fatichi, S., Zeeman, M. J., Fuhrer, J., and Burlando, P.: Ecohydrological effects of management on subalpine grasslands: From local to catchment scale, *Water Resour. Res.*, 50, 148–164, <https://doi.org/10.1002/2013WR014535>, 2014.
- 825 Fatichi, S., Leuzinger, S., Paschalis, A., Langley, J. A., Donnellan Barraclough, A., and Hovenden, M. J.: Partitioning direct and indirect effects reveals the response of water-limited ecosystems to elevated CO<sub>2</sub>, *Proc. Natl. Acad. Sci. USA*, 113, 12757–12762, <https://doi.org/10.1073/pnas.1605036113>, 2016.
- Fatichi, S., Manzoni, S., Or, D., and Paschalis, A.: A mechanistic model of microbially mediated soil biogeochemical processes: A reality check, *Global Biogeochem. Cycles*, 33, 620–648, <https://doi.org/10.1029/2018GB006077>, 2019.
- 830 Fatichi, S., Or, D., Walko, R., Vereecken, H., Young, M. H., Ghezzehei, T., Hengl, T., Kollet, S., Agam, N., and Avissar, R.: Soil structure – an important omission in Earth System Models, *Nat. Commun.*, 11, 522, <https://doi.org/10.1038/s41467-020-14411-z>, 2020.
- 835 Fatichi, S., Paschalis, A., Bonetti, S., Manoli, G., and Pappas, C.: Water use efficiency: A review of spatial and temporal variability, in: *Advances in Agronomy*, edited by: Sparks, D. L., Academic Press, <https://doi.org/10.1016/B978-0-12-822974-3.00166-X>, 2022.
- 840 Foley, J. A., Ramankutty, N., Brauman, K. A., Cassidy, E. S., Gerber, J. S., Johnston, M., Mueller, N. D., O’Connell, C., Ray, D. K., West, P. C., and Balzer, C.: Solutions for a cultivated planet, *Nature*, 478, 337–342, <https://doi.org/10.1038/nature10452>, 2011.
- Fraser, L. H.: TRY—A plant trait database of databases, *Global Change Biol.*, 26, 189–190, <https://doi.org/10.1111/gcb.14869>, 2020.
- 845 Gaupp, F., Hall, J., Mitchell, D., and Dadson, S.: Increasing risks of multiple breadbasket failure under 1.5 and 2°C global warming, *Agric. Syst.*, 175, 34–45, <https://doi.org/10.1016/j.agsy.2019.05.010>, 2019.
- 850 Godfray, H. C. J., Beddington, J. R., Crute, I. R., Haddad, L., Lawrence, D., Muir, J. F., Pretty, J., Robinson, S., Thomas, S. M., and Toulmin, C.: Food security: The challenge of feeding 9 billion people, *Science*, 327, 812–818, <https://doi.org/10.1126/science.1185383>, 2010.
- 855 He, L., Lipson, D. A., Mazza Rodrigues, J. L., Mayes, M., Björk, R. G., Glaser, B., Thornton, P., and Xu, X.: Dynamics of fungal and bacterial biomass carbon in natural ecosystems: Site-level applications of the CLM-microbe model, *J. Adv. Model. Earth Syst.*, 13, e2020MS002283, <https://doi.org/10.1029/2020MS002283>, 2021.
- Heinesch, B., Bodson, B., Chopin, H., De Ligne, A., Demoulin, L., Douxfils, B., Engelmann, T., Faurès, A., Longdoz, B., Manise, T., Piret, A., and Thyron, T.: Fluxnet Product, Lonze, 2003-12-31–2020-12-31, <https://hdl.handle.net/11676/ql2ZkJ2Xx4a4yOyG3cd5lsBS>, 2021.
- 860 Hörtnagl, L., Barthel, M., Buchmann, N., Eugster, W., Butterbach-Bahl, K., Díaz-Pinés, E., Zeeman, M., Klumpp, K., Kiese, R., Bahn, M., and Hammerle, A.: Greenhouse gas fluxes over managed grasslands in Central Europe, *Global Change Biol.*, 24, 1843–1872, <https://doi.org/10.1111/gcb.14079>, 2018.
- 865 [Hollinger, D. Y., and Richardson, A. D.: Uncertainty in eddy covariance measurements and its application to physiological models, \*Tree Physiol.\*, 25, 873–885, https://doi.org/10.1093/treephys/25.7.873, 2005.](https://doi.org/10.1093/treephys/25.7.873)

- Hussain, S., Ulhassan, Z., Brestic, M., Zivcak, M., Zhou, W., Allakhverdiev, S. I., Yang, X., Safdar, M. E., Yang, W., and Liu, W.: Photosynthesis research under climate change, *Photosynth. Res.*, 150, 5–19, <https://doi.org/10.1007/s11120-021-00861-z>, 2021.
- 870 Ingwersen, J., Högy, P., Wizemann, H. D., Warrach-Sagi, K., and Streck, T.: Coupling the land surface model Noah-MP with the generic crop growth model Gecros: Model description, calibration and validation, *Agric. For. Meteorol.*, 262, 322–339, <https://doi.org/10.1016/j.agrformet.2018.06.023>, 2018.
- 875 Jacquemin, I., Berckmans, J., Henrot, A. J., Dury, M., Tychon, B., Hambuckers, A., Hamdi, R., and François, L.: Using the CARAIB dynamic vegetation model to simulate crop yields in Belgium: Validation and projections for the 2035 horizon, *Geo-Eco-Trop*, 44, <https://hdl.handle.net/2268/256139>, 2021.
- 880 Kattge, J., Bönisch, G., Díaz, S., Lavorel, S., Prentice, I. C., Leadley, P., Tautenhahn, S., Werner, G. D., Aakala, T., Abedi, M., and Acosta, A. T.: TRY plant trait database—enhanced coverage and open access, *Global Change Biol.*, 26, 119–188, <https://doi.org/10.1111/gcb.14904>, 2020.
- 885 Khanal, S., Kc, K., Fulton, J. P., Shearer, S., and Ozkan, E.: Remote sensing in agriculture—accomplishments, limitations, and opportunities, *Remote Sens.*, 12, 3783, <https://doi.org/10.3390/rs12223783>, 2020.
- Krinner, G., Viovy, N., de Noblet-Ducoudré, N., Ogée, J., Polcher, J., Friedlingstein, P., Ciais, P., Sitch, S., and Prentice, I. C.: A dynamic global vegetation model for studies of the coupled atmosphere-biosphere system, *Global Biogeochem. Cycles*, 19, GB1015, <https://doi.org/10.1029/2003GB002199>, 2005.
- 890 Kim, S. M., and Mendelsohn, R.: Climate change to increase crop failure in US, *Environ. Res. Lett.*, 18, 014014, <https://doi.org/10.1088/1748-9326/acac41>, 2023.
- 895 Lawlor, D. W., and Mitchell, R. A. C.: The effects of increasing CO<sub>2</sub> on crop photosynthesis and productivity: A review of field studies, *Plant Cell Environ.*, 14, 807–818, <https://doi.org/10.1111/j.1365-3040.1991.tb01444.x>, 1991.
- Leng, G., and Hall, J. W.: Predicting spatial and temporal variability in crop yields: An inter-comparison of machine learning, regression, and process-based models, *Environ. Res. Lett.*, 15, 044027, <https://doi.org/10.1088/1748-9326/ab7b24>, 2020.
- 900 Leuning, R.: Modelling stomatal behaviour and photosynthesis of *Eucalyptus grandis*, *Aust. J. Plant Physiol.*, 17, 159–175, <https://doi.org/10.1071/PP9900159>, 1990.
- Leuning, R.: A critical appraisal of a combined stomatal-photosynthesis model for C<sub>3</sub> plants, *Plant Cell Environ.*, 18, 357–364, <https://doi.org/10.1111/j.1365-3040.1995.tb00370.x>, 1995.
- 905 Li, Z., Zhan, C., Hu, S., Ning, L., Wu, L., and Guo, H.: Implementation of a dynamic specific leaf area (SLA) into a land surface model (LSM) incorporated crop-growth model, *Comput. Electron. Agric.*, 213, 108238, <https://doi.org/10.1016/j.compag.2023.108238>, 2023.
- 910 Lobell, D. B., and Asseng, S.: Comparing estimates of climate change impacts from process-based and statistical crop models, *Environ. Res. Lett.*, 12, 015001, <https://doi.org/10.1088/1748-9326/aa518a>, 2017.
- Lobell, D. B., and Burke, M. B.: On the use of statistical models to predict crop yield responses to climate change, *Agric. For. Meteorol.*, 150, 1443–1452, <https://doi.org/10.1016/j.agrformet.2010.07.008>, 2010.

- 915 Manoli, G., Meijide, A., Huth, N., Knohl, A., Kosugi, Y., Burlando, P., Ghazoul, J., and Fatichi, S.: Ecohydrological changes after tropical forest conversion to oil palm, *Environ. Res. Lett.*, 13, 064035, <https://doi.org/10.1088/1748-9326/aac54e>, 2018.
- Mastrotheodoros, T., Pappas, C., Molnar, P., Burlando, P., Manoli, G., Parajka, J., Rigon, R., Szeles, B., Bottazzi, M., Hadjidoukas, P., and Fatichi, S.: More green and less blue water in the Alps during warmer summers, *Nat. Clim. Change*, 10, 155–161, <https://doi.org/10.1038/s41558-019-0676-5>, 2020.
- 920 McGrath, J. M., and Lobell, D. B.: Regional disparities in the CO<sub>2</sub> fertilization effect and implications for crop yields, *Environ. Res. Lett.*, 8, 014054, <https://doi.org/10.1088/1748-9326/8/1/014054>, 2013.
- 925 Moustakis, Y., Papalexiou, S. M., Onof, C. J., and Paschalis, A.: Seasonality, intensity, and duration of rainfall extremes change in a warmer climate, *Earth's Future*, 9, e2020EF001824, <https://doi.org/10.1029/2020EF001824>, 2021.
- Ortiz-Bobea, A., Ault, T. R., Carrillo, C. M., Chambers, R. G., and Lobell, D. B.: Anthropogenic climate change has slowed global agricultural productivity growth, *Nat. Clim. Change*, 11, 306–312, <https://doi.org/10.1038/s41558-021-01000-1>, 2021.
- 930 Osborne, T., Gornall, J., Hooker, J., Williams, K., Wiltshire, A., Betts, R., and Wheeler, T.: JULES-crop: a parametrisation of crops in the Joint UK Land Environment Simulator, *Geosci. Model Dev.*, 8, 1139–1155, <https://doi.org/10.5194/gmd-8-1139-2015>, 2015.
- 935 Pang, X., Fatichi, S., Lei, H., Cong, Z., Yang, H., and Duan, L.: Environmental changes promoted vegetation growth and reduced water yield over the temperate semi-arid grassland of China during 1901–2016, *J. Hydrol.*, 618, 129235, <https://doi.org/10.1016/j.jhydrol.2023.129235>, 2023.
- Paschalis, A., Katul, G. G., Fatichi, S., Palmroth, S., and Way, D.: On the variability of the ecosystem response to elevated atmospheric CO<sub>2</sub> across spatial and temporal scales at the Duke Forest FACE experiment, *Agric. For. Meteorol.*, 232, 367–383, <https://doi.org/10.1016/j.agrformet.2016.09.003>, 2017.
- 940 Paschalis, A., Fatichi, S., Pappas, C., and Or, D.: Covariation of vegetation and climate constrains present and future T/ET variability, *Environ. Res. Lett.*, 13, 104012, <https://doi.org/10.1088/1748-9326/aae267>, 2018.
- Paschalis, A., Bonetti, S., Guo, Y., and Fatichi, S.: On the uncertainty induced by pedotransfer functions in terrestrial biosphere modeling, *Water Resour. Res.*, 58, e2021WR031871, <https://doi.org/10.1029/2021WR031871>, 2022.
- 945 Paschalis, A., De Kauwe, M. G., Sabot, M., and Fatichi, S.: When do plant hydraulics matter in terrestrial biosphere modelling?, *Global Change Biol.*, 30, e17022, <https://doi.org/10.1111/gcb.17022>, 2024.
- Peleg, N., Fatichi, S., Paschalis, A., Molnar, P., and Burlando, P.: An advanced stochastic weather generator for simulating 2-D high-resolution climate variables, *J. Adv. Model. Earth Syst.*, 9, 1595–1627, <https://doi.org/10.1002/2016MS000854>, 2017.
- 950 Peng, B., Guan, K., Chen, M., Lawrence, D. M., Pokhrel, Y., Suyker, A., ... and Lu, Y.: Improving maize growth processes in the Community Land Model: Implementation and evaluation, *Agric. For. Meteorol.*, 250, 64–89, <https://doi.org/10.1016/j.agrformet.2017.11.012>, 2018.
- 955

- Polley, H. W.: Implications of atmospheric and climatic change for crop yield and water use efficiency, *Crop Sci.*, 42, 131–140, <https://doi.org/10.2135/cropsci2002.1310>, 2002.
- 960 de Pury, D. G. G., and Farquhar, G. D.: Simple scaling of photosynthesis from leaves to canopies without the errors of big-leaf models, *Plant, Cell Environ.*, 20, 537–557, <https://doi.org/10.1111/j.1365-3040.1997.00094.x>, 1997.
- 965 Roberts, M. J., Braun, N. O., Sinclair, T. R., Lobell, D. B., and Schlenker, W.: Comparing and combining process-based crop models and statistical models with some implications for climate change, *Environ. Res. Lett.*, 12, 095010, <https://doi.org/10.1088/1748-9326/aa7f33>, 2017.
- Sheehy, J. E., Mitchell, P. L., and Ferrer, A. B.: Decline in rice grain yields with temperature: Models and correlations can give different estimates, *Field Crops Res.*, 98, 151–156, <https://doi.org/10.1016/j.fcr.2006.01.001>, 2006.
- 970 Sheng, M., Liu, J., Zhu, A. X., Rossiter, D. G., Zhu, L., and Peng, G.: Evaluation of CLM-Crop for maize growth simulation over Northeast China, *Ecol. Model.*, 377, 26–34, <https://doi.org/10.1016/j.ecolmodel.2018.03.005>, 2018.
- Slater, L. J., Huntingford, C., Pywell, R. F., Redhead, J. W., and Kendon, E. J.: Resilience of UK crop yields to compound climate change, *Earth Syst. Dynam.*, 13, 1377–1396, <https://doi.org/10.5194/esd-13-1377-2022>, 2022.
- 975 Steduto, P., Hsiao, T. C., Raes, D., and Fereres, E.: AquaCrop—The FAO crop model to simulate yield response to water: I. Concepts and underlying principles, *Agron. J.*, 101, 426–437, <https://doi.org/10.2134/agronj2008.0139s>, 2009.
- 980 Sun, W., Fang, Y., Luo, X., Shiga, Y. P., Zhang, Y., Andrews, A. E., Thoning, K. W., Fisher, J. B., Keenan, T. F., and Michalak, A. M.: Midwest US croplands determine model divergence in North American carbon fluxes, *AGU Adv.*, 2, e2020AV000310, <https://doi.org/10.1029/2020AV000310>, 2021.
- 985 Suzuki, S., Nakamoto, H., Ku, M. S., and Edwards, G. E.: Influence of leaf age on photosynthesis, enzyme activity, and metabolite levels in wheat, *Plant Physiol.*, 84, 1244–1248, <https://doi.org/10.1104/pp.84.4.1244>, 1987.
- Ukkola, A. M., De Kauwe, M. G., Roderick, M. L., Abramowitz, G., and Pitman, A. J.: Robust future changes in meteorological drought in CMIP6 projections despite uncertainty in precipitation, *Geophys. Res. Lett.*, 47, e2020GL087820, <https://doi.org/10.1029/2020GL087820>, 2020.
- 990 Van Klompenburg, T., Kassahun, A., and Catal, C.: Crop yield prediction using machine learning: A systematic literature review, *Comput. Electron. Agric.*, 177, 105709, <https://doi.org/10.1016/j.compag.2020.105709>, 2020.
- Waha, K., Müller, C., and Rolinski, S.: Separate and combined effects of temperature and precipitation change on maize yields in sub-Saharan Africa for mid-to late-21st century, *Global Planet. Change*, 106, 1–12, <https://doi.org/10.1016/j.gloplacha.2013.02.009>, 2013.
- 995 Wang, Y.-P., and Leuning, R.: A two-leaf model for canopy conductance, photosynthesis and partitioning of available energy I: Model description and comparison with a multi-layered model, *Agric. For. Meteorol.*, 91, 89–111, <https://doi.org/10.1016/j.agrformet.1998.01.004>, 1998.
- 1000 Wang, W., Pijl, A., and Tarolli, P.: Future climate-zone shifts are threatening steep-slope agriculture, *Nat. Food*, 3(3), 193–196, <https://doi.org/10.1038/s43016-021-00454-y>, 2022.



Wiltshire, A. J., Burke, E. J., Chadburn, S. E., Jones, C. D., Cox, P. M., Davies-Barnard, T., Friedlingstein, P., Harper, A. B., Liddicoat, S., Sitch, S., and Zaehle, S.: JULES-CN: a coupled terrestrial carbon–nitrogen scheme (JULES vn5.1), *Geosci. Model Dev.*, 14, 2161–2186, <https://doi.org/10.5194/gmd-14-2161-2021>, 2021.

1005

Wu, X., Vuichard, N., Ciais, P., Viovy, N., de Noblet-Ducoudré, N., Wang, X., Magliulo, V., Wattenbach, M., Vitale, L., Di Tommasi, P., Moors, E. J., Jans, W., Elbers, J., Ceschia, E., Tallec, T., Bernhofer, C., Grünwald, T., Moureaux, C., Manise, T., Ligne, A., Cellier, P., Loubet, B., Larmanou, E., and Ripoche, D.: ORCHIDEE-CROP (v0), a new process-based agro-land surface model: model description and evaluation over Europe, *Geosci. Model Dev.*, 9, 857–873, <https://doi.org/10.5194/gmd-9-857-2016>, 2016.

1010

Yin, X., Leng, G., and Yu, L.: Disentangling the separate and confounding effects of temperature and precipitation on global maize yield using machine learning, statistical and process crop models, *Environ. Res. Lett.*, 17(4), 044036, <https://doi.org/10.1088/1748-9326/ac5716>, 2022.

1015

[Zhang, W., Liu, C., Zheng, X., Wang, K., Cui, F., Wang, R., Li, S., Yao, Z., and Zhu, J.: Using a modified DNDC biogeochemical model to optimize field management of a multi-crop \(cotton, wheat, and maize\) system: a site-scale case study in northern China, \*Biogeosciences\*, 16, 2905–2922, <https://doi.org/10.5194/bg-16-2905-2019>, 2019.](https://doi.org/10.5194/bg-16-2905-2019)

1020

Zhang, Z., Paschalis, A., Mijic, A., Meili, N., Manoli, G., van Reeuwijk, M., and Fatichi, S.: A mechanistic assessment of urban heat island intensities and drivers across climates, *Urban Clim.*, 44, 101215, <https://doi.org/10.1088/1748-9326/ac5716>, 2022.

1025

1030

1035

1040



**Code and data Availability:** The current version of model is available at doi.org/10.24433/CO.0905087.v3 and is updated regularly. The exact version of the model used to produce the results used in this paper is archived on Zenodo (doi.org/10.5281/zenodo.13343701), as are input data and scripts to run the model and produce the plots for all the simulations presented in this paper.

**Author Contribution:**

JBP and AP designed the project and carried out the simulations. SF and AP are the main developers behind T&C, with modifications for T&C-CROP made by JBP, SF and AP. JBP prepared the manuscript with contributions from all co-authors.

**Competing Interests:**

The authors declare that they have no conflict of interest.

**Acknowledgements:**

Thank you to the respective PI's and data managements across the four sites who made data available. Also to the developers of WeplotDigitizer, an open-sourced web-based tool to obtain data from plots (<https://github.com/ankitrohatgi/WebPlotDigitizer>).
